# Supplementary material for: Dopamine increases protein synthesis in hippocampal neurons enabling dopamine-dependent LTP
Source: eLife journal article supplement (doi:10.7554/elife.100822), 2024-09-02
Supplement: fig1-data3 [file elife-100822-fig1-data3-v1.pdf]

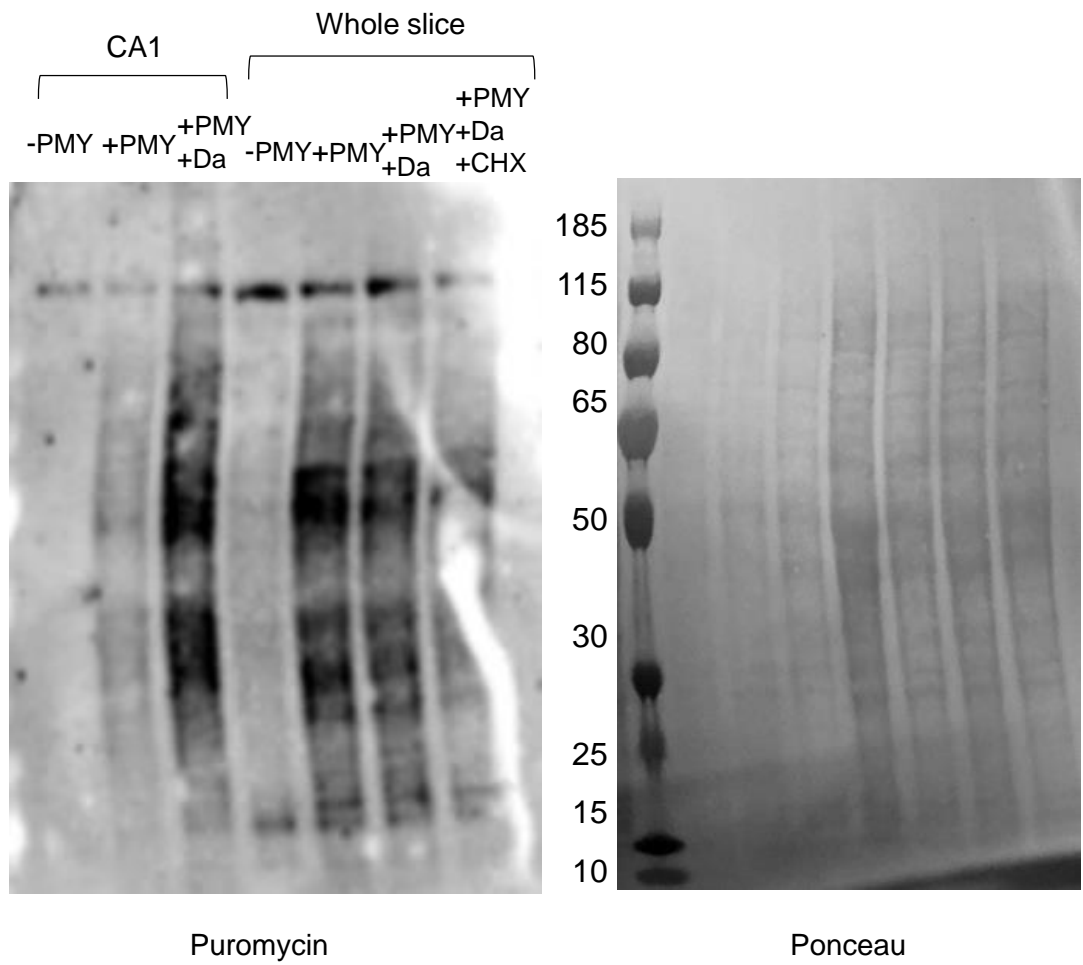

**Figure 1, Source data 1.** Original western blots corresponding to Figure 1D. Pageruler prestained ladder was used, with the molecular weights shown in kDa..
