# Supplementary material for: Dopamine increases protein synthesis in hippocampal neurons enabling dopamine-dependent LTP
Source: eLife journal article supplement (doi:10.7554/elife.100822), 2024-09-02
Supplement: fig3-data3 [file elife-100822-fig3-data3-v1.pdf]

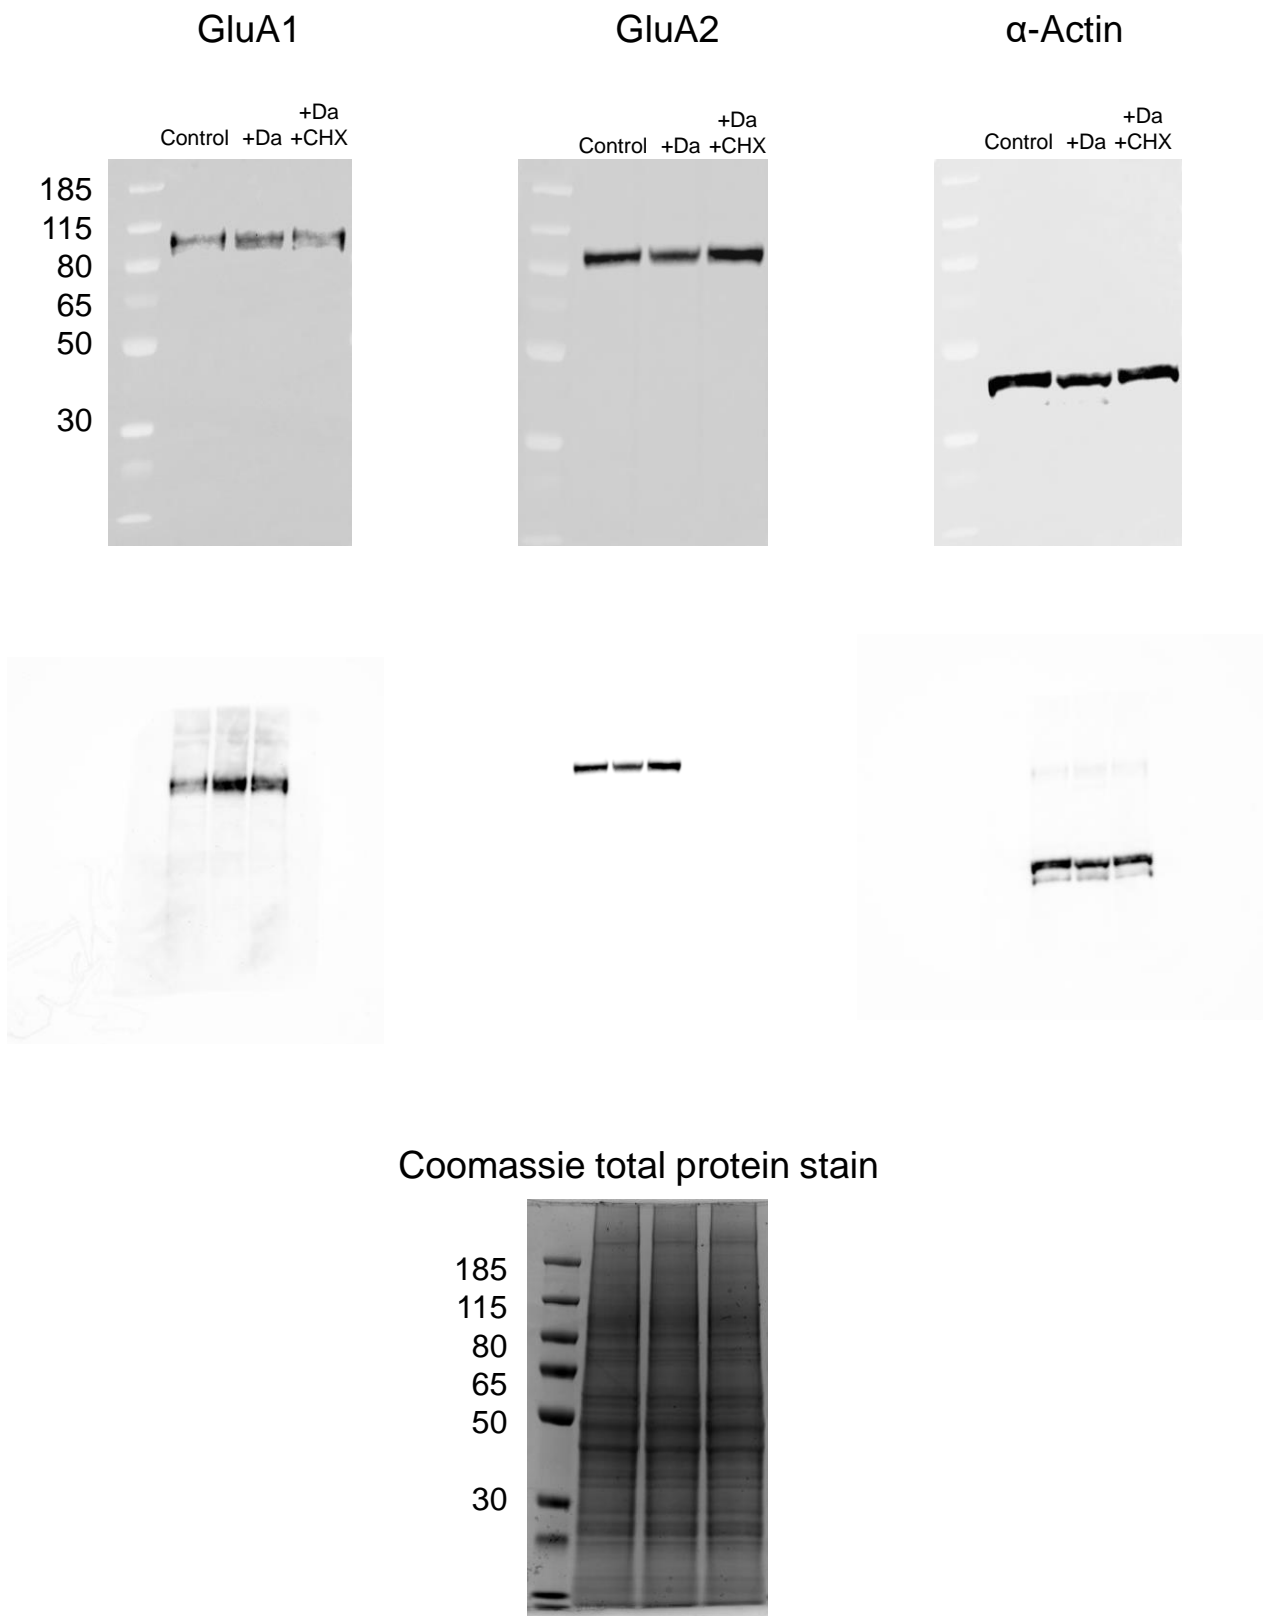

**Figure 3, Source data 1.** Original western blots shown both with and without ladder overlay corresponding to Figure 3A (GluA1) and figure 3C (GluA2) with  $\alpha$ -actin control and the total protein Coomassie stain of the gel used for western blotting. Pageruler prestained ladder was used, with the molecular weights shown in kDa.
