# Supplementary material for: Dopamine increases protein synthesis in hippocampal neurons enabling dopamine-dependent LTP
Source: eLife. 2025 Mar 10;13:RP100822. doi: 10.7554/eLife.100822 (PMC11893101; doi:10.7554/eLife.100822)
Supplement: Figure 1—figure supplement 1—source data 1. [file elife-100822-fig1-figsupp1-data1.xlsx]

## Sheet: Figure 1S B and D
	+ PMY - CHX	+ PMY + CHX		+ PMY - AM	+ PMY + AM
	2.29555	0.243988		0.749881	0.169016
	0.295295	0.348659		0.928339	0.110843
	3.33199	0.312555		0.442857	0.084636
	0.773988	0.298794		0.30324	0.263113
	2.54484	0.551284			0.169518
	0.779666	0.650979
	2.91616	0.511925
		0.478427

## Sheet: Figure 1S E
			t-LTD								control pathway
101.547	118.064	100.762	88.2713	120.961	94.6195	98.2553		67.9891	112.99	102.232	93.2714	107.599	102.531	81.5982
102.404	124.21	94.8501	89.1257	88.0464	110.517	86.3816		79.5527	104.374	92.7675	99.8853	117.782	118.243	72.8886
95.658	83.4688	97.8058	102.051	111.835	119.525	93.3062		94.4503	104.518	104.089	86.4767	99.2737	136.798	90.8801
114.346	86.9348	94.6156	82.8566	90.9031	91.4754	80.642		91.5594	104.569	115.983	131.4	100.923	94.6877	106.17
84.3385	98.5431	89.7037	91.5632	87.2574	94.7458	92.4744		82.76	91.0945	101.004	96.2481	66.7225	90.2333	114.498
78.3909	101.974	114.122	116.334	67.5892	95.9075	111.585		110.53	114.801	101.199	100.765	76.9385	94.2778	72.7933
100.199	92.4863	102.012	120.345	99.3052	69.4284	98.796		126.25	90.1212	105.331	94.4235	119.568	91.2992	112.464
92.8384	93.9718	91.8263	95.377	123.247	81.6809	125.33		101.266	73.9894	94.104	101.888	108.178	84.7952	125.433
122.407	108.406	113.584	95.4307	111.704	120.274	113.727		123.423	93.3628	101.696	103.73	105.238	91.3811	102.642
107.871	91.9412	100.718	118.645	99.1517	121.827	99.503		122.22	110.18	81.594	91.9118	97.7785	95.7533	120.633
70.2711	72.4886	78.115	82.3746	64.3306	67.9972	103.101		145.398	120.394	92.513	92.6897	54.8115	91.5723	135.255
69.651	64.9635	66.7178	85.0873	59.6913	61.3091	92.9527		134.628	85.1784	108.718	108.727	93.214	111.384	164.563
78.4938	59.2469	73.16	86.5804	102.827	54.0864	105.055		122.389	81.9792	114.062	102.664	95.6794	118.517	172.351
80.9801	71.2803	82.2814	82.8387	103.725	28.9541	102.248		147.879	89.6641	115.586	106.289	100.028	91.9823	136.559
69.6484	95.3321	71.9073	86.8951	92.474	43.3869	87.151		138.278	99.8206	114.394	107.364	67.7928	99.7159	108.999
73.8225	55.921	71.4074	55.3877	75.5383	44.8601	83.803		147.985	100.379	114.593	112.254	54.0035	108.515	122.222
65.9766	75.1964	62.787	78.8721	80.9376	45.7187	98.6504		123.992	87.8444	95.2684	103.567	132.958	100.071	115.071
93.6272	72.1156	59.1216	88.2712	90.8666	39.9017	91.0605		141.992	85.0599	108.948	97.5424	87.9083	111.658	133.634
87.5866	75.7016	72.4257	63.2578	75.0195	37.8436	99.1495		136.041	56.7659	96.774	88.1976	93.8055	87.6101	138.243
63.9336	56.311	52.5313	54.866	63.4758	41.3118	92.0169		125.174	89.5456	97.1152	107.474	89.0744	104.006	120.506
73.3742	86.7697	62.0403	72.1803	56.4473	50.0246	94.429		123.465	56.6135	113.652	91.0233	94.2052	113.106	126.069
82.1853	69.6098	50.4888	62.2774	59.0337	45.7272	103.184		126.018	78.4921	99.9104	87.8332	97.8494	96.1359	123.335
56.634	57.4064	46.0212	102.437	83.29	53.8506	99.0872		125.385	82.5123	95.9679	106.849	71.7201	96.6006	155.599
71.9069	67.9643	50.7479	90.7087	85.7084	36.9722	97.6316		129.078	57.6207	89.4449	117.61	94.8799	101.766	108.617
70.5376	69.0097	59.3746	110.02	71.2934	55.1807	100.314		126.904	83.8158	95.176	119.887	81.9944	99.7704	130.074
63.3506	53.1601	61.0098	84.0619	71.3737	44.1488	104.743		121.27	96.4012	102.986	113.137	103.613	88.2659	107.918
60.7737	40.5416	71.5124	74.5367	83.1074	35.4234	112.437		134.374	89.6811	93.9049	111.754	127.056	82.3632	135.065
43.8545	47.7786	76.4675	79.3128	80.1923	45.7567	109.942		130.618	87.2266	99.0602	150.437	98.2908	83.0464	142.026
85.4824	26.6626	69.5131	81.5165	83.2682	64.9162	113.103		108.778	74.8019	109.307	129.943	73.5817	85.3144	127.372
89.0024	47.3935	67.162	88.2893	45.583	40.7479	101.146		132.623	84.9584	102.791	105.96	142.482	100.59	141.835
54.956	61.8226	75.6468	83.837	63.9215	39.6703	93.9092		123.929	76.9179	102.698	122.313	99.1487	87.4186	155.822
56.6878	62.2128	72.0739	73.3136	69.2769	27.241	103.433		127.516	90.172	98.4133	95.7683	105.3	97.0924	163.705
68.4604	53.3352	77.5042	68.7084	56.8784	48.6567	88.3571		134.501	93.0581	98.5213	119.354	123.933	86.7356	199.816
85.6881	45.1379	81.6571	90.1871	76.8534	67.1429	99.4407		118.886	65.0856	86.6042	88.3338	96.6999	92.5289	139.483
61.222	32.9094	63.8237	74.141	54.3212	63.603	97.8394		112.429	101.217	89.853	108.588	99.2237	93.3213	155.313
46.1155	37.9659	65.5761	65.8572	63.2932	44.6581	85.0715		124.161	131.399	90.1615	138.636	123.987	83.1831	143.457
71.564	31.9991	81.8236	53.4809	58.1131	34.6784	90.2078		132.222	110.722	90.0207	135.239	97.6703	75.2035	124.607
62.5325	30.4737	48.619	66.7026	70.2486	35.2972	104.036		109.074	100.024	102.744	99.3108	124.949	95.4528	151.69
63.1081	50.2443	63.367	83.3154	93.1387	63.3883	102.393		127.305	70.4516	87.716	96.3222	110.822	91.4084	138.688
75.9903	33.4896	61.3801	90.0162	78.4023	63.3925	115.328		127.094	99.1943	94.3926	95.9193	84.9013	92.5561	160.463
85.2644	47.4086	69.1922	59.9119	80.1557	57.243	126.911		99.5991	78.1535	93.2708	97.8831	101.219	86.2982	149.592
58.0448	31.7841	52.1796	49.5592	90.1797	57.8156	135.104		123.317	83.9596	101.427	95.8601	84.0143	87.5827	174.068
64.1688	30.6387	49.989	59.1384	91.6849	37.3848	121.317		107.322	91.9154	80.8618	90.81	99.1362	90.3974	172.224
104.021	19.9007	67.341	76.3446	64.3014	31.753	102.31		128.192	122.689	100.006	85.7747	122.4	99.4972	187.005
85.3746	36.4505	74.3756	63.3567	64.0603	58.148	104.951		112.956	99.0589	98.837	79.7828	95.3755	97.3658	160.685
80.2305	23.4617	60.0287	62.4303	85.8911	40.0828	113.893		114.201	96.9768	122.193	128.281	91.0526	93.7038	144.855
88.3729	21.7062	68.4579	46.9689	88.85	53.3287	94.6787		113.209	97.4337	83.0356	119.932	112.917	99.9345	144.283
73.7367	26.3075	64.4717	66.5676	75.8671	60.7366	131.901		105.951	99.6089	63.8748	115.394	92.4769	95.2888	199.021
80.6176	29.4183	56.0239	56.8988	62.3214	61.8941	115.307		109.39	86.5072	87.9677	123.853	86.0091	88.4844	154.964
68.9258	24.757	67.7976	56.0173	66.5225	56.6538	129.177		101.815	66.9477	83.293	137.401	124.724	89.6869	161.512
66.2117	26.8676	67.2899	53.7686	49.8133	62.6897	102.976		125.702	93.5067	96.3742	96.5502	93.8763	81.1063	142.916

## Sheet: Figure 1S F
	t-LTD	Control Pathway
	75.344	95.2871
	26.4014	92.0303
	62.0191	85.6685
	51.3187	120.357
	68.5329	100.493
	60.3762	99.3443
	104.554	150.281

## Sheet: Figure 1S G
					Control Pathway for -20ms + DA
	94.6299	96.5119	159.071	90.4465	75.2792	129.08	85.0177	95.0832	105.566
	86.3962	104.359	99.8187	107.766	111.371	123.384	82.8488	104.251	106.055
	83.8171	131.968	100.202	84.5448	87.1192	105.457	108.537	109.39	71.8039
	90.0655	90.8588	113.494	94.2383	91.9289	111.968	107.573	99.9261	116.575
	92.9991	98.1078	90.9231	115.228	105.19	135.772	83.5717	103.993	94.679
	99.4426	88.9657	82.8711	106.702	95.8629	95.7139	87.4756	98.1885	97.2478
	109.91	106.068	96.6489	99.8342	106.853	72.5881	125.309	96.3031	113.517
	104.45	86.4418	99.2561	98.868	120.47	85.7221	109.067	103.808	110.703
	126.315	103.787	86.1684	105.02	97.2715	63.4552	116.038	95.342	104.709
	111.975	92.9315	71.5472	97.3513	108.655	76.8604	94.5604	93.7154	79.1436
	105.942	112.683	82.3214	114.869	126.053	77.5452	139.878	67.7636	131.271
	99.088	89.0501	103.142	118.616	131.51	61.33	117.598	69.1684	133.945
	97.8117	75.9939	107.794	109.118	115.736	58.9338	107.381	88.244	117.553
	92.556	71.9987	72.135	93.8958	115.66	80.4096	118.352	67.2458	93.7004
	110.982	89.3437	92.6868	70.295	124.899	81.1104	93.6928	68.6138	125.504
	109.631	82.2891	91.9966	87.6516	105.127	80.4549	105.501	78.2995	98.4709
	2.91028	88.7897	108.177	83.7803	118.02	69.2648	98.8982	81.7376	116.33
	27.0587	85.9942	85.5296	95.7857	109.924	58.3687	111.67	58.965	178.716
	120.439	76.2433	88.2135	115.631	108.109	71.1185	100.44	69.353	140.673
	99.1855	90.8697	106.49	111.632	132.449	72.4523	91.7168	54.7876	170.275
	95.8087	90.1985	116.868	115.124	147.716	64.6758	113.453	32.5694	132.722
	95.0908	83.5143	113.724	117.001	145.343	33.7509	117.502	42.366	106.3
	106.497	80.3154	85.2482	107.357	127.119	45.6643	108.826	62.7357	137.492
	97.4661	83.9032	85.0183	114.096	128.629	50.0271	137.455	50.6838	108.257
	132.103	76.1185	73.6944	106.195	136.65	57.4192	149.793	63.5121	133.211
	134.38	78.9029	112.753	100.605	131.041	66.4165	111.766	54.0481	136.636
	107.924	69.2987	97.2623	101.4	141.269	56.2211	117.068	56.0074	132.477
	107.401	75.7627	85.4017	106.017	142.97	60.7875	120.442	55.9705	128.318
	104.876	80.0879	85.9895	128.774	136.523	42.3863	128.683	35.4897	98.104
	101.986	80.0072	66.2815	131.074	145.838	34.4516	109.694	49.2422	109.847
	111.452	75.4032	77.5797	126.609	137.919	67.2756	113.164	38.5214	135.902
	123.071	80.7446	73.9245	109.895	159.822	36.9383	117.261	49.9446	126.361
	112.471	69.218	82.002	109.809	135.343	53.4632	111.718	39.5934	140.55
	105.983	75.759	85.7595	130.046	144.835	57.3514	109.935	67.2458	201.52
	105.531	80.5391	84.8393	110.353	140.622	35.2881	115.622	61.4048	24.0734
	110.211	91.4603	62.0383	113.668	149.746	51.9486	136.25	70.1293	105.554
	116.903	77.8611	86.782	124.346	155.939	56.289	96.4884	62.2182	154.128
	109.927	72.6335	95.4986	131.282	145.178	55.1813	127.96	60.3327	170.153
	108.43	88.254	107.231	119.735	151.206	50.7731	106.176	66.3216	171.376
	124.259	76.7055	101.455	109.106	143.02	50.5923	144.684	65.6562	166.361
	113.375	88.4119	97.2113	136.211	115.102	41.2334	131.141	62.8835	159.511
	137.181	90.3708	97.5435	137.073	123.122	78.9403	130.274	54.2699	145.566
	115.352	82.843	75.7905	157.231	123.401	72.7011	137.889	72.5694	152.049
	114.722	86.871	67.2018	125.239	123.376	44.9633	134.226	53.7153	149.358
	118.002	68.3926	87.3701	129.325	141.891	38.5884	150.95	51.2754	159.144
	120.678	79.2332	84.8905	118.5	132.614	44.6921	143.624	56.0443	160.367
	113.286	88.3202	76.9663	96.7825	122.221	52.1747	161.408	43.8817	156.942
	114.04	82.9127	68.2754	87.3703	156.345	39.5605	152.781	68.8725	177.737
	111.567	77.5272	90.4629	78.1477	125.127	44.8052	144.443	23.2162	177.615
	106.763	87.4104	87.4211	86.2327	141.929	43.1776	138.274	34.1219	156.208
	114.979	88.6136	84.2002	79.3647	158.528	29.8852	137.551	57.5971	169.419
	104.149	91.6401	91.383	96.9721	175.609	41.3915	148.54	44.7321	183.242

## Sheet: Figure 1S H
		ControlPathway_AM0.5											ControlPathway_CHX
104.791	98.7472	107.993	120.364	105.993	86.9561					112.441	86.694	112.862	83.4852	82.6217	106.453
75.4307	103.483	76.0621	135.946	91.692	102.8					119.123	90.178	92.5774	79.1136	82.5591	89.9127
86.7486	98.0617	126.146	85.2844	101.296	93.4144					120.984	101.384	84.4747	97.4303	73.9983	116.31
130.497	96.9988	115.258	85.8476	101.309	89.5671					118.657	98.5272	88.0076	94.8198	92.2543	111.644
97.8253	107.156	94.7927	73.8595	80.1795	108.86					110.613	100.72	91.1224	103.556	90.0758	112.445
107.709	100.923	97.1433	111.835	90.2793	89.4532					86.2053	104.485	115.563	101.688	97.9266	94.3761
101.492	106.433	83.3724	84.614	119.922	119.303					87.0631	102.387	98.7307	120.976	106.209	86.8893
114.637	94.8604	103.783	68.147	93.1668	130.455					90.9455	93.3219	94.9889	110.453	104.497	93.7613
82.092	83.1562	101.779	130.394	106.898	104.289					83.7121	113.163	118.288	97.335	125.015	83.2386
98.7768	79.5084	93.671	103.709	109.265	119.694					70.2571	109.14	103.385	111.144	144.844	104.97
130.789	94.311	149.894	51.9211	99.0408	88.0624					69.0016	98.1916	58.7924	94.6685	116.437	99.5211
117.492	92.1875	108.347	89.1731	90.3661	85.1993					53.7748	93.8009	91.9061	121.356	85.524	95.993
146.395	73.6469	124.66	113.257	111.21	131.008					70.836	58.3832	68.9889	114.756	73.5598	91.6812
150.773	80.4832	119.998	81.0202	105.249	97.18					89.1141	53.2722	87.0832	134.36	73.9078	85.1672
147.245	98.5145	140.444	83.8363	87.8875	85.9638					91.7469	42.4065	86.5125	151.622	56.2086	69.7094
122.339	66.1815	110.636	83.1926	95.2736	100.93					85.5315	50.8926	74.3545	123.248	55.6379	68.4799
120.778	81.1248	126.827	63.8561	105.46	98.2456					78.307	41.0181	96.2187	125.039	55.8815	67.785
108.788	92.2881	91.8509	99.3108	99.2515	117.327					68.7433	48.7514	57.4177	160.205	59.3475	71.5326
126.513	89.6844	133.971	97.2457	99.5365	99.7015					79.4289	51.9606	56.8993	124.008	44.8291	64.3744
116.756	96.961	111.16	76.8365	91.4319	92.1697					87.0987	61.5696	79.5151	144.52	44.0496	78.8468
122.935	112.03	87.7237	75.3346	79.5474	90.9822					94.9259	69.9479	82.0472	160.044	47.272	54.2769
92.1791	125.634	132.492	75.7639	106.105	88.6235					79.6901	47.1556	56.6863	168.981	53.0488	64.6353
117.834	101.672	110.542	69.2465	96.5871	103.947					86.8495	56.2565	71.1479	162.14	59.1388	66.3829
82.4345	94.5146	123.101	84.7482	85.2852	103.459					77.9567	53.6051	79.7402	115.077	43.0613	77.7857
108.547	116.822	139.116	84.292	84.5913	88.6804					84.1128	61.6163	57.7956	132.027	48.6849	80.4005
110.501	90.0743	158.691	57.8487	97.4918	99.3274					80.4203	57.2364	72.4695	120.32	54.2946	76.7624
84.2871	98.8541	100.317	28.9377	90.7626	86.7528					89.8681	61.0118	87.9674	91.5874	43.2353	64.5049
100.312	104.961	132.135	49.5614	87.9	77.6432					85.4069	59.1993	84.3903	105.743	70.1842	94.7761
104.372	78.8795	129.688	50.9024	75.8297	105.183					82.3645	57.5557	91.7093	65.0039	58.93	96.3804
93.156	113.722	143.906	67.557	84.207	113.781					87.7309	62.9104	107.276	92.9239	66.2031	85.3356
116.705	92.3951	151.557	57.0439	92.9066	144.396					75.321	61.5894	88.9722	86.2916	85.7397	71.3053
90.6692	72.6344	134.414	62.0861	102.015	139.955					81.3909	72.8875	127.858	99.1329	105.304	73.0275
84.3378	86.6782	160.251	55.5959	83.166	136.018					85.6799	64.3278	106.636	96.1087	149.277	74.8002
56.5509	77.4078	126.011	73.0549	77.1309	134.708					78.2506	80.9298	99.3497	83.3981	144.196	69.2799
96.5057	81.7851	149.312	58.0903	74.64	119.686					79.0608	89.5247	113.111	88.5183	166.127	70.1389
86.9388	87.1247	150.194	75.6295	64.2303	91.023					65.0717	88.9057	103.216	87.4526	161.186	75.7476
87.1419	80.9298	144.584	54.2012	73.0042	105.249					82.9077	86.2968	97.6536	105.991	159.794	74.0212
105.578	78.4519	155.908	66.2965	71.9136	93.5932					61.7355	85.5492	97.3642	95.0906	157.309	86.5062
102.406	70.5714	129.794	60.2621	72.5332	111.267					72.5872	91.1257	91.6409	92.5905	160.866	71.1789
94.4249	76.8292	128.509	71.5799	85.7684	94.195					79.0579	89.5371	120.04	109.232	149.938	87.9378
91.2148	76.2129	121.381	87.0545	61.095	88.5584					64.3773	97.3741	101.182	79.3858	155.089	83.1754
107.747	81.7726	148.724	65.1432	83.798	96.1471					66.3036	93.4536	102.98	105.183	173.588	66.2902
78.6153	73.1563	141.109	70.5873	77.5027	95.472					73.8309	88.7574	127.588	107.45	140.904	78.0046
70.3428	72.0809	158.677	99.2571	69.398	107.925					81.8451	97.4612	102.087	101.256	148.198	93.4286
96.9625	73.1752	143.374	75.3345	80.4645	105.232					72.2636	93.9202	126.145	107.205	163.775	76.7035
92.7627	75.5273	157.548	72.009	78.8534	113.61					57.0636	86.0179	115.181	105.701	149.904	57.8687
84.0586	74.911	140.374	84.4531	111.185	103.402					72.0114	87.5349	111.974	95.6038	156.404	85.2387
106.504	74.823	188.988	71.4727	108.137	89.136					68.8205	96.8412	80.974	88.3291	138.239	103.913
104.55	79.9046	204.73	76.6486	103.403	100.189					71.7413	92.9849	128.525	88.4761	139.137	88.7211
76.154	78.6468	142.787	71.6334	97.343	95.773					75.3981	83.5355	118.312	106.099	140.661	98.4058
104.715	71.5526	209.602	85.3114	96.5871	87.436					69.2867	87.6241	108.525	95.5044	144.565	103.097

## Sheet: Figure 1S I
	Control PW-20ms +DA	Control PW-20ms +DA +CHX	Control PW-20ms +DA +AM
	99.9094	84.0866	94.3508
	89.5232	85.8373	81.7057
	96.6209	106.309	184.784
	84.2716	89.0397	78.1031
	143.195	120.052	99.4225
	50.4121	103.389	84.5382
	135.493
	46.8965
	170.92
