# Supplementary material for: Dopamine increases protein synthesis in hippocampal neurons enabling dopamine-dependent LTP
Source: eLife. 2025 Mar 10;13:RP100822. doi: 10.7554/eLife.100822 (PMC11893101; doi:10.7554/eLife.100822)
Supplement: Figure 1—source data 1. [file elife-100822-fig1-data1.xlsx]

## Sheet: Figure 1 C
	Control	+PMY	+PMY +DA	+PMY +SKF	+PMY +DA +SCH+Sul
	0.466565	0.633285	0.892029	0.777	0.5008
	0.408851	0.592079	0.873847	0.954	0.6156
	0.363288	0.655956	0.78038	0.74	0.5742
	0.424091	0.492427	0.944792	0.849	0.5295
	0.423082	0.517214	0.748079	0.694	0.75
	0.427157	0.639504	0.740378	0.747	0.677
	0.431252	0.424091	0.638294	0.733	0.61
	0.28796	0.463288	0.757588	0.783	0.66
	0.266565	0.443601	0.734974	0.819
			0.792
			0.872
			0.792
			0.872
			0.8
			0.748
			0.74

## Sheet: Figure 1 E
	Control	+PMY	+PMY +DA
	1.49	19.8	125
	0.51	132	216
	8.22	133	256
	7.66	94.4	161
	9.35	107	248

## Sheet: Figure 1 F
				-20ms +DA								-20ms +DA +CHX							-20ms +DA +AM
78.9743	61.7036	98.2118	82.5344	91.6859	89.9754	97.8902	70.4475	76.8347		93.7661	99.1236	104.596	103.73	101.002	102.243		71.8791	101.761	86.7271	65.7442	74.7441	92.4231
95.5925	87.0188	103.886	94.9489	81.6335	63.889	85.175	74.677	76.5199		101.027	98.5451	85.1703	114.863	97.15	91.2213		116.013	88.4921	108.543	76.2492	107.905	77.2532
111.166	93.1754	73.3979	82.9079	90.6953	104.345	80.8619	101.158	86.4841		95.7736	103.808	101.997	134.29	104.886	120.73		128.451	102.739	99.9927	89.6644	101.093	97.3976
102.893	95.2143	116.561	106.548	93.7627	84.0165	85.5324	89.8508	83.0426		105.74	91.712	97.7545	110.041	87.9294	115.47		107.654	128.424	106.811	117.475	112.609	106.996
118.274	91.7121	92.9526	113.369	121.709	159.148	90.8511	116.448	114.06		120.312	104.485	100.626	102.383	103.89	71.5529		130.919	109.085	91.8208	115.559	102.969	84.1364
106.817	109.294	114.439	113.75	107.087	89.9873	104.173	111.318	133.516		99.8867	94.5797	116.067	91.9134	111.999	95.3088		90.1243	109.687	95.0883	106.865	110.536	100.45
103.552	99.7606	74.9491	97.0903	98.5813	88.1153	105.769	124.079	110.191		80.4747	85.9193	110.014	100.809	98.1273	82.1154		77.7208	74.0443	100.943	124	112.106	135.279
84.7536	113.197	109.832	110.114	107.049	110.387	122.257	118.018	112.058		103.443	103.581	89.2122	68.7881	86.1588	106.298		101.241	91.5772	109.569	143.475	107.388	84.2813
99.0803	116.727	121.221	107.158	96.2424	93.8728	111.767	115.983	101.869		101.824	114.719	89.9241	87.333	101.44	107.548		76.1296	90.1726	113.794	101.819	95.4032	111.645
98.8979	132.197	94.55	91.5804	111.554	116.263	115.725	78.0198	105.423		97.7529	103.526	104.639	85.8488	107.418	107.513		64.8678	104.018	111.703	118.872	75.247	110.138
96.7281	137.263	176.857	97.3219	104.889	79.4063	138.635	69.1104	85.5232		66.6041	109.682	95.6367	28.5982	83.2715	88.1233		43.088	54.6088	74.4143	199.919	62.783	128.739
99.4759	145.303	149.085	118.551	104.205	81.3509	134.864	75.9997	116.354		61.5513	130.247	102.824	34.0739	104.416	98.3342		68.9313	59.8476	85.4384	190.137	86.7153	126.382
99.334	151.714	138.538	158.53	81.6143	105.731	136.576	92.903	124.227		38.4318	69.4754	84.1193	28.0378	99.5425	68.4096		68.9155	81.2682	109.594	126.97	79.5842	87.8522
139.992	161.431	159.033	153.089	104.199	96.1475	134.169	87.4818	95.7287		39.8626	67.6726	77.3685	23.1443	76.3798	86.2733		53.5364	72.765	102.275	124.625	72.3648	67.913
132.844	155.054	140.648	162.379	95.1304	102.201	124.908	81.8859	108.437		38.2722	62.4789	83.3787	35.7147	72.4135	96.351		41.9006	72.7902	88.5655	126.549	77.2457	83.5468
91.7639	155.351	131.843	151.709	91.4366	78.6499	112.6	69.997	85.0671		29.6107	53.4362	75.7107	24.8418	92.2827	79.2101		59.3184	86.2846	85.2836	129.514	69.5028	79.7482
50.1947	158.424	158.981	149.339	86.6501	83.4953	130.252	95.8969	111.833		24.208	81.0894	82.3086	25.8045	79.6162	94.3525		69.542	65.792	77.4498	116.808	47.9667	86.8745
66.9797	180.234	135.407	154.262	90.7975	69.3148	137.257	105.286	97.2582		25.1636	115.234	70.0062	26.8286	87.1425	81.3739		48.8801	66.0429	64.7277	129.131	75.1859	82.7915
113.316	179.224	144.864	159.048	79.9975	93.0081	126.936	92.8447	103.826		22.8287	102.654	80.3593	18.3173	93.8247	98.4972		41.9344	75.148	67.5067	105.19	76.43	59.6486
111.481	178.302	142.546	169.23	97.169	72.3238	127.094	70.8254	121.213		29.7802	97.658	74.4733	13.8174	90.5693	97.0738		35.4702	71.0092	38.0886	142.06	82.2763	86.5555
121.539	190.043	150.907	185.417	108.634	104.405	120.802	86.2608	85.0446		30.2405	84.0838	77.8176	10.887	83.5379	112.636		31.9953	72.8403	57.307	154.915	68.2519	52.9585
105.478	185.469	156.668	165.397	90.9701	110.624	141.222	91.4932	83.9875		34.6561	111.504	84.0046	15.9227	72.3691	73.4314		30.0938	53.7272	62.36	125.928	110.468	57.8434
124.479	188.589	147.228	156.556	81.9785	76.3281	137.058	100.417	146.495		29.1204	113.207	75.4166	18.4216	69.323	84.4533		16.4313	42.1892	66.0225	128.548	137.932	55.895
102.852	228.238	150.533	167.035	82.8284	60.3587	140.648	91.653	101.419		28.9509	84.8524	87.0336	18.5971	73.2512	86.2469		16.5506	70.8839	48.7117	102.514	98.5983	68.9441
131.637	195.722	190.046	173.238	105.323	81.4577	131.177	114.617	134.776		24.7199	97.0796	95.7814	19.1281	64.1448	72.3914		22.8856	48.0586	58.2985	154.572	133.343	83.8605
126.152	189.213	133.406	160.603	86.388	76.8374	128.432	93.8185	95.7287		20.0468	111.251	104.262	12.9259	56.4027	94.8736		18.3029	44.2962	66.7717	154.682	161.446	75.0307
122.532	218.462	136.422	186.697	140.05	84.5022	139.892	108.019	113.498		20.3758	101.452	107.463	19.5406	61.5112	70.6153		32.0919	43.92	73.7933	141.961	152.534	65.7456
114.806	200.55	119.75	167.439	111.068	101.893	157.145	89.7925	108.032		24.1117	98.7883	113.53	5.34394	74.1523	87.6957		29.6523	40.9352	35.3545	171.467	158.815	64.8455
112.9	220.633	173.824	202.556	101.246	65.974	167.45	74.2119	110.191		23.5865	108.283	124.074	23.3245	64.5065	125.93		35.9157	31.9303	56.0876	124.887	166.789	73.9013
127.318	211.736	166.91	193.068	116.341	95.0813	158.009	81.668	106.503		17.9662	98.2283	104.467	18.8247	68.8027	106.626		60.0524	33.1093	55.9593	144.477	177.02	76.3842
119.744	209.884	170.912	191.491	124.367	108.551	142.593	79.2699	116.264		11.126	83.9734	87.2008	29.7306	61.213	101.962		30.6707	17.4075	69.7013	138.35	173.172	77.4308
128.484	203.213	162.204	163.606	111.618	91.3376	161.74	103.876	116.962		19.3239	115.161	83.4074	26.6817	83.1255	86.1356		31.8302	38.3014	71.7473	170.662	128.741	55.1104
131.424	201.098	158.191	176.63	102.716	102.556	143.158	92.3215	120.381		18.1589	83.0475	77.8463	26.0225	84.2741	91.424		36.7888	48.7107	63.4757	121.759	133.003	56.3277
133.625	208.491	194.526	149.332	89.8965	94.6191	137.257	88.7897	43.5715		17.6288	87.1784	76.37	26.7148	71.4299	95.2735		43.3745	23.5026	60.6621	126.017	145.097	52.1171
147.282	206.912	191.539	125.806	103.093	125.48	153.33	92.6123	5.02015		14.7555	65.8534	87.7693	25.5057	70.0084	91.7325		43.8757	29.0459	54.1983	114.859	162.792	58.3554
128.261	219.393	215.626	164.581	110.346	119.391	144.438	107.917	66.7663		12.5253	100.389	82.3372	35.174	83.7093	76.6253		49.2441	26.4373	51.4561	138.596	143.975	54.9001
122.289	216.592	223.913	138.205	109.918	132.019	152.715	129.253	124.924		9.17837	71.1167	90.0865	30.3707	48.4893	79.4183		39.9017	23.7032	45.8167	144.271	137.191	51.3671
124.581	214.835	204.814	117.11	138.037	97.7468	125.149	110.838	121.73		11.1676	101.907	74.7121	26.6533	64.9253	82.5814		46.2447	15.0999	46.57	188.761	114.431	38.6076
116.449	226.903	236.467	115.358	126.042	105.968	173.616	107.394	113.385		3.83055	100.295	80.2351	21.5796	73.3211	91.327		55.7621	35.6427	52.6755	146.024	115.607	46.2702
141.817	239.694	245.198	102.882	124.872	98.268	161.574	90.6502	120.628		7.65278	81.3305	75.3332	33.5477	76.5066	105.529		66.6758	23.5276	59.858	125.729	81.1818	36.2299
147.424	231.253	242.891	135.18	119.658	78.3538	176.625	112.771	109.269		5.92945	83.7976	80.3689	31.9118	69.1581	74.2566		53.7313	35.0156	60.5929	126.599	92.3441	49.2824
145.64	241.879	243.554	105.58	137.014	65.2988	181.985	119.428	115.365		4.91237	86.1524	66.4782	33.4054	87.5232	93.243		39.2194	35.9186	68.9704	97.3449	104.9	38.268
140.631	228.764	297.565	116.173	135.378	80.7113	187.877	108.062	142.378		3.06113	83.0618	76.2171	42.5854	64.6525	78.9897		31.0247	30.0492	42.6449	141.183	95.6003	28.6484
134.608	221.322	336.674	101.808	124.668	78.5906	178.81	90.0107	138.33		6.89663	63.6234	71.9364	31.0915	90.3091	78.5589		32.6059	17.307	39.5463	148.63	81.916	40.0181
131.911	251.321	248.698	101.762	150.217	106.774	174.206	101.536	141.299		5.74166	72.8439	76.2075	31.3949	83.2905	78.9853		42.4615	21.3956	50.9369	88.6987	90.4746	34.0315
124.854	232.897	238.607	92.0986	137.104	79.7636	159.804	98.8038	152.702		4.19783	94.6247	75.9734	28.602	73.3972	66.7118		42.4198	18.0344	56.2709	68.0239	127.483	44.0856
134.304	252.197	263.501	104.437	135.104	113.917	188.218	107.713	135.968		8.76288	90.2506	79.7095	28.2891	68.7583	60.5343		39.7545	23.4274	63.7729	78.5908	97.9321	35.8437
131.181	241.662	206.036	95.4214	123.952	81.7063	152.142	89.5165	155.424		6.05909	75.6176	71.5016	35.4443	77.4205	75.0575		45.7533	30.3502	42.6286	92.0465	92.7043	39.1594
127.774	223.869	185.161	114.756	122.604	75.5935	164.4	77.7437	152.972		4.46208	74.4301	69.2418	22.5516	60.8385	64.267		36.1643	27.7416	52.2582	66.4119	96.5928	22.9377
128.423	260	226.053	121.995	125.997	97.8179	166.752	96.3184	115.77		5.3578	73.5715	72.481	26.5536	77.6299	72.8265		41.9643	28.5943	64.7848	111.863	79.7814	33.7073
130.877	249.643	206.694	116.623	128.374	97.2492	166.735	88.2375	183.855		4.06322	87.8039	72.8919	19.5975	65.8772	81.256

## Sheet: Figure 1 G
	-20 +DA	-20 +DA +AM	-20 +DA +CHX
	132.326	50.4999	5.93815
	214.974	29.4249	79.9303
	211.165	54.7175	71.7353
	106.449	83.6555	30.4693
	122.19	81.3087	69.4059
	93.5125	39.0648	70.9603
	149.777
	83.9361
	132.149

## Sheet: Figure 1 H
			Cycloheximide							Control Pathway
	79.3292	133.926	75.2593	68.3895	63.4656	68.7587		92.2186	98.8317	97.4534	100.029	111.27	97.8564
	84.6803	123.886	99.1782	97.5902	76.697	89.553		107.315	95.1064	105.643	99.652	121.199	83.811
	94.0409	87.1139	95.3426	86.8814	84.4393	95.8112		96.2002	103.302	103.851	103.364	135.34	98.2581
	98.7065	89.2183	110.565	104.35	102.226	113.132		99.374	101.661	95.9686	100.45	119.558	98.38
	108.524	118.589	103.466	105.532	96.3161	90.4905		99.835	99.5173	111.232	101.856	85.6339	96.6062
	110.485	98.6874	93.5447	100.502	112.921	102.171		103.62	94.8041	90.2366	93.5334	107.323	106.234
	105.111	92.5886	91.7335	122.366	116.475	97.6144		99.0459	112.188	103.336	97.7816	87.0201	100.638
	101.824	97.9741	102.561	110.072	127.586	114.538		97.3316	98.6104	97.3939	99.5359	78.9414	95.8422
	106.895	76.004	109.912	99.291	116.759	115.623		103.395	100.311	97.4256	90.3438	81.0491	112.468
	110.403	82.0137	118.437	105.027	103.115	112.309		101.665	95.668	97.4596	113.455	72.6649	109.905
	119.093	104.911	136.687	91.0438	116.865	121.882		104.007	90.539	75.3979	54.2147	107.486	117.664
	102.414	89.0399	131.101	153.93	104.514	155.818		109.925	85.842	79.6355	104.973	58.0854	116.904
	115.091	114.059	133.285	132.916	122.124	143.242		104.115	91.284	69.1784	105.597	54.1499	98.4877
	90.96	91.7505	140.916	151.495	120.995	140.915		110.153	83.2181	66.4805	100.087	53.63	119.79
	114.207	97.6889	143.26	136.044	115.493	133.41		117.315	92.1208	84.6504	95.2588	51.0101	122.681
	101.92	81.4251	154.501	141.824	104.072	160.091		117.477	84.3303	76.4636	111.875	53.9894	137.662
	74.5752	94.8892	150.479	166.671	116.183	161.883		118.021	79.5469	82.1608	112.991	41.5662	124.873
	92.95	101.719	230.679	178.043	99.3041	150.875		122.633	88.0988	68.0575	92.3446	47.7375	116.499
	100.107	78.8573	199.036	148.871	99.4768	170.298		111.941	84.0928	73.4701	90.9961	59.4229	136.518
	82.4175	103.895	234.448	172.379	107.538	155.265		125.645	77.4521	60.5333	92.3588	52.0854	115.057
	80.9582	70.6719	218.759	153.051	102.757	167.705		118.627	88.2661	67.6132	94.8529	51.862	118.08
	84.4297	77.2167	258.806	139.099	103.611	176.478		122.125	89.7185	74.4243	96.9697	70.398	106.213
	90.6948	87.2745	192.017	157.26	102.505	166.783		116.798	76.6747	63.6755	93.0551	50.8176	112.666
	101.352	124.777	227.136	147.877	93.908	173.154		114.93	85.232	71.9655	90.7352	49.677	120.435
	119.292	88.0234	185.145	186.547	94.5321	183.084		119.909	78.7694	60.937	102.392	40.6922	123.328
	106.866	103.271	198.17	163.89	101.903	170.572		113.429	75.2225	65.5839	92.1996	60.1221	143.418
	102.06	86.9356	176.382	164.755	89.5255	177.316		124.239	76.8583	71.9457	101.711	70.5629	149.952
	106.475	92.4816	169.63	179.989	115.085	171.203		107.068	77.3334	55.8557	102.987	58.0532	117.166
	120.147	80.3553	158.922	164.481	104.107	166.594		105.364	77.9813	70.8496	105.336	65.0466	150.388
	123.199	133.854	150.412	170.577	105.023	184.794		99.6834	78.6507	68.7945	119.11	61.9565	115.833
	122.3	125.811	193.495	165.936	101.801	187.35		112.092	76.9555	59.5325	110.961	53.9541	103.429
	109.357	138.58	188.581	142.818	107.241	197.312		122.289	86.1174	64.8568	102.291	81.1807	120.087
	125.336	114.345	178.286	145.614	102.447	191.075		112.589	71.9454	76.6203	105.06	58.291	116.276
	163.811	90.8055	211.275	160.834	94.271	215.83		103.52	73.4624	66.0381	108.772	62.6292	129.333
	160.479	92.6243	206.96	150.832	94.0718	208.261		114.196	67.7828	57.16	111.875	67.1254	114.086
	176.547	66.8914	193.002	154.103	109.787	192.983		108.678	73.484	69.5076	120.618	53.9475	131.416
	150.507	99.8644	193.389	173.719	116.311	186.927		109.592	69.6562	59.9422	120.357	56.9192	115.914
	139.923	93.2486	195.759	172.595	114.926	166.453		110.789	67.5938	68.734	107.946	37.1882	124.012
	149.644	116.592	231.718	150.27	119.171	213.343		97.6707	79.9302	67.7471	110.961	27.3074	135.742
	186.578	86.9892	202.964	165.417	115.679	186.085		111.091	71.7995	53.7758	111.976	53.1786	133.066
	197.524	92.4103	155.699	161.022	127.48	198.386		114.086	72.3395	59.0663	115.978	49.1879	116.942
	187.581	82.2278	172.014	165.965	118.467	178.041		117.173	67.2051	68.5138	132.275	68.5881	115.675
	219.51	53.0708	221.45	167.421	117.33	186.447		116.541	69.5373	56.2187	114.746	43.9869	138.972
	203.302	89.2004	240.574	154.492	120.149	192.913		117.357	69.7749	64.1109	105.814	49.2477	140.03
	208.122	89.2004	206.72	180.883	127.068	224.584		108.442	71.1895	51.7632	105.394	63.959	124.336
	181.529	94.8891	200.727	159.004	107.954	200.536		108.05	67.4966	55.2963	105.234	42.5066	124.557
	165.233	88.6832	198.17	175.074	111.978	209.88		107.126	71.5026	62.9892	121.952	46.9608	135.331
	205.41	66.1067	247.379	163.472	112.372	196.585		100.254	74.5908	62.6004	117.819	41.6712	116.87
	203.184	97.4035	226.497	166.542	104.244	200.619		109.894	75.6165	65.3071	114.673	39.3955	113.962
	208.417	100.738	215.11	188.594	114.196	189.389		118.821	63.1397	59.8648	122.561	33.5649	122.798
	172.663	118.607	207.572	182.973	128.166	199.716		112.205	68.7762	59.5841	123.112	35.1426	119.427
	153.499	89.4499	219.851	191.462	123.616	202.29		106.247	69.8667	63.5188	126.939	37.2822	128.799

## Sheet: Figure 1 I
	+10 +CHX	- +CHX
	176.427	108.416
	105.601	70.1894
	216.376	63.9909
	166.139	122.309
	100.953	43.8056
	182.212	114.667
