# Supplementary material for: Dopamine increases protein synthesis in hippocampal neurons enabling dopamine-dependent LTP
Source: eLife. 2025 Mar 10;13:RP100822. doi: 10.7554/eLife.100822 (PMC11893101; doi:10.7554/eLife.100822)
Supplement: Figure 2—source data 1. [file elife-100822-fig2-data1.xlsx]

## Sheet: Figure 2C
-DA -TTX	-DA +TTX	+DA -TTX	+DA +TTX
0.6332	0.6731	0.792	0.586
0.5921	0.4773	0.872	0.691
0.656	0.5025	0.8	0.639
0.492	0.5919	0.892	0.683
0.5172	0.4865	0.874	0.695
0.6395	0.4802	0.7804	0.696
0.4241	0.4553	0.945	0.629
0.4436	0.533	0.748	0.705
		0.74	0.564

## Sheet: Figure 2E
	-DA	-DA +Rp-cAMPS	+DA	+DA +Rp-cAMPS
	0.832988	1.87	1.44437	1.30974
	0.940684	4.05075	3.25674	0.973197
	1.08495	1.30939	2.26244	0.949983
	1.1005	1.45277	2.89904	0.991618
	0.788925	1.80657	3.05941	1.07254
	0.82474	0.824842	1.86526	1.32523
	1.62333	1.31476	2.41151	1.94302
	1.44742	1.29186	1.73325	1.59875
	1.58736		1.24404	1.57531
	1.41725		1.47037

## Sheet: Figure 2F
			ACDKO										WT
109.818	124.832	77.1348	97.9497	89.2899	104.387	86.8376				105.799	139.112	99.1915	84.9552	97.9212	96.7871
96.5119	85.686	93.5039	104.556	101.073	115.839	96.1644				106.188	126.667	93.8115	95.4954	103.75	90.6316
86.7551	104.894	107.507	87.9658	90.4594	90.6171	116.447				103.354	104.269	95.2691	101.36	110.419	93.8844
118.608	154.775	91.0449	112.402	91.9586	93.9499	107.508				104.848	67.0055	84.0161	96.1774	96.3799	107.797
89.0449	118.994	107.421	125.389	98.165	94.1442	96.3642				103.484	141.974	111.887	98.9608	99.2451	89.0301
110.785	92.9529	89.7367	105.173	115.165	106.753	91.6946				94.3841	93.8094	110.489	117.583	105.035	85.3267
94.3622	78.3253	101.052	85.0118	100.803	113.636	90.6521				86.1489	83.5461	97.4172	112.178	104.877	119.908
93.6753	88.6964	129.58	105.179	118.704	92.1786	110.429				98.5388	81.0158	99.6627	117.134	84.9487	95.536
90.6096	71.7262	96.699	99.0278	103.862	107.864	109.106				95.6867	72.3567	100.538	105.624	104.156	113.402
109.831	79.1182	106.32	77.3464	90.5194	80.6301	94.7972				101.57	90.2449	107.717	144.251	120.244	107.697
122.322	59.2716	96.3102	81.5717	96.486	56.7822	105.054				110.926	64.5081	92.2297	132.137	132.274	106.896
76.3624	55.0084	100.209	80.3564	99.0046	60.2171	110.585				130.548	55.0888	108.404	122.362	119.845	122.61
81.1963	64.7854	94.3545	68.7399	90.4893	57.7893	112.62				139.011	47.0903	121.962	134.886	99.5613	117.256
98.0003	73.2359	88.1286	74.5669	77.0568	34.6573	107.152				142.32	92.6519	106.908	120.432	103.444	127.765
107.274	55.6203	81.6523	45.8245	82.9636	41.3231	92.0754				137.486	154.295	95.8566	117.203	110.163	131.318
87.4167	76.9051	81.6238	40.521	77.8364	37.0773	84.6401				133.542	123.526	94.5236	129.611	100.806	131.118
114.372	103.375	73.9752	32.9116	82.7237	44.1199	82.8984				139.159	106.495	116.488	126.355	100.609	120.158
94.1715	74.5669	87.721	66.5275	82.5138	34.5835	88.3859				134.159	99.679	104.467	124.093	99.9663	122.06
97.924	71.1903	81.445	54.0695	81.5244	41.3114	84.9461				117.244	141.726	112.332	134.492	96.2712	121.509
75.5482	48.6327	74.8188	57.061	77.6566	26.764	101.521				121.325	130.361	107.121	147.154	104.314	129.266
68.3866	68.4077	89.5224	51.1031	85.4222	26.1969	96.0146				131.653	135.39	118.17	167.686	88.0214	133.57
89.9863	70.1741	85.7911	45.893	67.0724	34.6418	84.559				141.653	84.6407	108.898	138.05	118.926	139.075
74.3907	76.2663	84.5616	50.9285	69.0215	48.9444	82.7673				134.752	120.314	103.126	146.266	101.31	125.213
83.804	65.3392	81.5308	38.7012	67.4023	32.2722	76.4183				147.549	71.7553	103.989	147.846	94.1766	137.174
66.1222	77.5192	72.7958	60.5509	59.8165	34.2417	68.1529				116.219	112.451	112.871	141.173	102.417	148.334
98.7763	78.734	78.8003	55.1103	77.5066	34.0047	71.8049				130.103	101.975	106.521	147	159.573	136.523
93.0011	64.2405	80.5301	39.0876	78.7059	45.2347	89.7905				122.183	125.017	117.463	146.876	146.037	147.283
65.1046	47.5115	100.216	46.7655	64.7637	40.8297	83.7412				138.307	114.21	107.92	147.322	142.342	151.286
81.8068	52.5586	82.267	66.7518	62.5449	34.9642	86.3133				122.806	93.1863	105.783	140.991	116.012	142.278
95.0237	72.3671	100.731	55.5839	60.866	35.9741	79.0341				139.524	89.3465	113.871	140.772	134.309	145.131
92.8357	72.5458	88.0427	57.0235	69.0514	30.5203	79.5772				124.948	100.128	108.689	148.014	130.13	137.974
90.0499	61.7594	90.3229	67.9172	61.4656	33.6823	88.2735				131.967	87.8127	104.218	161.499	136.533	134.721
93.7771	53.3245	125.684	78.5055	65.6632	46.5088	76.7617				135.764	103.585	127.252	158.376	124.973	131.669
78.6139	52.0293	117.3	81.3723	64.6139	36.4402	69.5513				153.481	81.4323	107.429	164.567	151.066	129.767
75.8917	51.0556	104.826	81.902	60.4761	39.105	66.1489				146.382	120.781	121.58	150.746	148.942	123.211
81.5524	48.1591	105.741	74.1244	49.7721	42.302	84.8338				139.53	106.392	119.331	142.348	160.432	111.3
71.0326	62.215	114.147	75.5453	49.5023	47.5033	81.0256				135.9	88.2884	123.666	153.547	136.137	129.066
98.5091	60.788	114.248	58.4071	55.6788	50.203	70.9622				130.294	131.151	117.432	154.465	161.065	109.449
96.4102	52.706	121.41	54.5058	50.3417	31.2079	67.2851				128.01	111.269	117.924	155.764	159.365	106.996
79.5553	60.8438	114.14	53.733	50.4618	33.9581	57.5026				134.313	80.9176	102.957	164.409	176.932	118.056
98.0258	42.4198	118.701	55.2287	58.7671	43.2536	58.052				130.214	117.619	123.506	158.027	137.362	115.704
105.493	49.8653	126.256	46.1112	53.9997	52.0093	56.9158				125.794	119.835	129.157	173.16	154.149	111.801
109.576	46.3525	113.876	43.4812	50.2219	45.4911	66.1052				138.073	114.366	128.912	172.21	144.595	123.161
106.905	70.25	114.026	46.267	56.6083	41.8669	63.5394				126.597	110.804	133.992	155.079	162.309	128.566
111.37	43.025	112.232	47.6194	53.0702	26.228	74.5581				124.121	100.096	116.948	160.782	167.25	110.449
100.583	64.379	115.992	56.4627	56.5783	31.0914	67.9344				123.491	122.796	118.635	152.093	175.598	112.251
111.866	78.9439	125.763	55.1103	67.1624	45.7669	63.4208				140.19	101.829	124.311	147.425	151.501	107.747
83.6004	54.6265	97.8499	49.6011	54.5994	37.1473	65.5871				129.368	84.6722	120.986	130.478	153.091	117.956
126.8	56.5605	126.578	60.9311	47.5833	45.2308	62.2346				120.645	99.2223	106.476	131.109	141.235	116.054
115.059	54.6265	130.367	71.3636	44.7948	52.5803	77.8542				115.38	113.647	123.824	139.311	173.632	115.404

## Sheet: Figure 2G
			WT + PKI(6-22) inhibitor fragment
	84.3994	102.017	97.9923	90.5482	98.2541	105.151
	96.8181	102.896	103.692	104.893	90.1397	92.8103
	101.694	85.8134	112.508	108.156	87.05	116.511
	84.4903	99.7709	104.824	106.07	105.756	134.009
	90.6599	96.483	99.4439	91.2263	91.9995	96.2481
	101.529	101.861	96.4555	106.49	80.4716	83.9734
	111.297	106.247	89.5314	100.682	121.885	84.8438
	116.712	110.033	100.789	103.884	101.078	96.0939
	94.7976	104.196	89.5598	85.7237	99.5919	100.259
	117.603	90.6818	105.204	102.325	123.775	90.0997
	62.988	99.3778	108.414	74.1016	84.1009	56.5259
	108.51	91.1582	81.8939	60.7425	107.267	46.7081
	81.4763	87.0044	88.4525	58.4268	89.7155	69.2303
	81.9588	87.0444	81.1842	58.87	93.5857	74.949
	81.3459	85.386	72.7871	63.5396	94.9109	69.6491
	87.7311	77.1339	99.8095	41.2465	92.1376	65.7374
	96.103	76.82	105.797	46.4739	90.8124	81.5823
	93.6794	82.2361	99.2061	46.1071	96.1634	69.6601
	112.637	76.9247	91.1959	64.8159	85.9181	80.6677
	124.635	85.9648	68.8087	47.9871	95.7869	67.1919
	146.408	60.7855	67.3855	46.9555	100.583	78.4529
	105.695	72.3078	71.0552	52.2364	100.493	67.1258
	154.308	79.6271	90.2022	74.9575	91.7058	55.3688
	128.847	85.4951	101.03	66.5737	129.05	68.2276
	110.412	80.3751	79.1931	77.1432	108.76	67.9852
	114.759	86.8886	85.9894	55.1176	79.1891	57.4955
	93.6226	88.9277	91.9093	52.0912	88.5033	66.7952
	103.141	109.548	81.0102	63.7842	102.719	73.7149
	89.4622	92.3603	93.9003	65.3661	85.6746	71.3129
	113.704	93.0237	75.6902	80.7429	83.747	75.7975
	101.387	87.3538	82.5399	86.0009	91.6431	81.406
	95.8532	90.7665	72.2903	72.3667	85.8855	79.5769
	92.9075	95.7351	78.1887	76.3407	95.438	76.3484
	96.5911	96.1914	94.2481	77.3343	80.065	72.0401
	78.9223	84.2151	94.39	69.2409	76.0919	80.0067
	75.6871	84.8785	87.9521	76.6006	77.3393	76.5027
	96.9373	94.2213	92.2748	68.8742	85.7725	74.4862
	113.755	91.4632	93.6341	81.1173	100.041	64.2829
	123.846	106.883	111.756	89.3024	73.1829	75.3788
	128.739	85.2591	110.4	72.382	85.5918	69.8915
	108.306	81.7219	128.241	67.1163	85.9858	73.3183
	92.7542	90.1542	106.766	63.0352	70.894	81.5272
	105.003	90.9111	116.387	75.7676	98.4047	85.3837
	104.662	79.4379	106.379	80.0015	95.044	67.1698
	109.299	69.0243	100.31	66.7494	81.7241	70.4865
	92.5556	87.3071	80.7747	54.4221	95.7166	86.1661
	95.927	83.0486	93.3289	71.1821	92.3785	55.7766
	107.086	99.7465	72.4678	57.1964	71.4637	73.3954
	89.1047	82.0669	98.1627	61.3692	87.931	71.1036
	86.5279	72.8464	81.5603	64.4719	99.4036	65.8036
	88.0093	85.5774	96.8602	69.3938	86.6535	86.5517
	82.8443	86.617	78.5685	80.376	76.742	84.1166

## Sheet: Figure 2H
	-20 WT +DA	-20 ACDKO +DA	-20 WT +DA +PKI
	132.046	107.74	83.6808
	124.005	75.2488	83.2066
	115.116	113.979	88.7966
	117.337	62.2101	66.68
	153.032	51.1703	80.1139
	109.1	42.2736	83.6793
		67.8569
