# Supplementary material for: Dopamine increases protein synthesis in hippocampal neurons enabling dopamine-dependent LTP
Source: eLife. 2025 Mar 10;13:RP100822. doi: 10.7554/eLife.100822 (PMC11893101; doi:10.7554/eLife.100822)
Supplement: Figure 3—source data 1. [file elife-100822-fig3-data1.xlsx]

## Sheet: Figure 3 B and D
GluA1 Blots					GluA2 Blots
	Control	+Da	+Da +CHX			Control	+Da	+Da +CHX
	0.719	0.916	0.664			1.15	1.05	0.908
	0.44	0.603	0.54			0.976	0.843	0.956
	0.559	1.01	0.542			0.607	0.577	0.584
	0.425	0.902	0.782			0.241	0.255	0.197
	0.251	0.641	0.592			0.361	0.465	0.382
	0.163	1.09	0.451			1.52	1.15	1.56
	0.472	0.743	0.387

## Sheet: Figure 3 E
						GluA1 KO -20ms												+10 ms GluA1 KO
93.1156	108.895	76.6829	108.954	96.4467	61.7785	86.1464	98.6827	118.237	111.108	98.3213	114.883	84.6386			73.4788	88.9008	87.884	89.1489	106.37	84.605
99.4713	106.269	113.629	122.968	104.114	91.479	112.632	85.4815	75.6253	121.093	85.793	91.4372	93.2071			82.0728	90.3398	105.499	67.2898	95.6598	92.2912
93.3803	110.449	108.925	97.8034	116.424	84.2618	89.4553	111.867	96.7131	116.038	113.488	97.8782	98.6471			90.5333	110.225	91.609	96.7314	92.9174	65.7144
97.0543	114.499	89.3129	91.869	83.6897	77.906	102.877	101.582	123.764	101.277	89.3285	91.1361	105.576			100.761	110.068	101.525	88.5181	124.08	100.119
98.1302	104.711	95.4333	89.8954	108.421	99.2942	99.1201	92.995	68.0629	107.239	92.9119	111.211	116.398			86.7363	118.563	98.2675	106.721	83.1474	118.995
104.761	92.2604	89.9258	95.4743	95.1472	104.772	99.3297	92.2314	121.291	104.077	97.8755	107.63	100.162			106.34	84.6358	101.508	110.892	101.608	130.143
109.285	92.8888	99.301	94.998	98.495	114.958	99.482	108.166	108.639	86.2742	123.686	88.3974	99.7247			105.058	99.0179	100.73	109.837	116.261	91.1467
91.1404	112.513	125.373	94.7812	102.813	115.379	99.6915	110.346	103.257	70.4342	90.4116	101.49	100.542			114.187	106.065	97.7728	98.2376	90.8526	96.4027
104.589	80.3155	96.4686	96.375	99.707	133.652	106.576	96.0491	95.2588	102.963	106.279	93.273	103.691			119.788	94.4913	106.952	99.6279	91.9265	115.463
109.072	77.1991	104.949	106.881	94.7432	116.52	104.691	102.6	89.1507	79.4956	101.905	102.664	97.4133			121.045	97.6922	108.252	132.996	97.1762	105.12
53.335	77.8723	95.1699	57.1739	89.1704	90.7494	20.339	100.536	100.131	74.2116	76.2375	65.1014	82.2232			159.444	92.6118	95.2579	156.902	74.6866	108.427
88.4284	66.9612	103.823	70.8539	118.362	89.0733	73.2867	99.8888	117.365	105.389	69.7503	51.1061	82.4054			120.397	89.424	117.175	147.363	100.659	117.172
98.4065	60.3342	99.5992	90.3609	112.687	84.7747	80.0998	98.9925	116.346	61.2371	70.4032	58.2392	81.281			129.5	96.855	142.912	172.363	92.6078	109.868
76.4882	78.6457	104.543	92.0109	103.428	82.2443	71.0824	95.9828	155.905	83.5981	81.0364	43.2505	87.4393			107.327	103.309	157.962	137.437	95.7999	123.997
78.0589	70.1966	91.5325	80.5294	118.447	88.0546	67.7639	93.7143	127.982	80.5781	92.7579	57.8781	80.6512			127.273	81.1907	139.873	131.966	107.287	140.598
82.3753	68.0731	82.7288	83.4969	89.8343	81.424	75.9291	84.2311	139.325	111.946	65.2007	64.4095	85.8827			121.481	88.4647	137.471	157.43	108.487	125.876
79.2905	74.3393	86.6461	56.2042	98.1414	87.5842	57.8276	88.0487	149.942	89.1539	63.2738	55.9519	78.7146			109.518	93.9681	142.701	170.445	103.994	116.833
77.5138	77.4817	66.0074	69.2026	91.7147	83.4897	63.7551	97.4213	87.4054	76.2601	59.2657	44.4846	91.2967			124.184	68.3435	143.649	168.012	97.9855	151.252
92.7497	80.52	80.534	74.4897	112.757	83.0221	50.3575	103.054	78.6796	97.4584	74.7723	72.2347	88.8761			137.211	73.0794	125.898	125.671	118.35	127.628
88.1741	76.0537	64.79	69.7546	105.709	69.4307	66.8762	98.3064	105.294	118.532	74.7775	61.9113	81.4424			164.958	80.7982	145.058	135.918	135.962	138.041
88.2699	78.5044	99.1851	71.3559	94.305	80.5838	58.6228	93.7585	90.8959	99.2783	76.4445	56.0722	78.22			167.295	80.2749	128.152	151.753	106.619	124.11
86.1955	66.7195	115.815	58.6528	96.6591	105.161	61.2603	90.4277	97.1497	95.5542	75.5367	53.0926	69.6776			162.588	61.9331	123.264	128.529	77.4688	153.202
90.966	65.3472	107.906	72.9647	93.6678	73.5139	68.3067	91.3794	87.2599	64.5195	68.9008	60.2258	69.0946			169.545	80.8068	144.167	136.536	82.4229	123.629
88.7593	75.8083	104.701	73.4518	90.4121	87.0728	69.1779	109.804	90.0232	96.9865	95.7043	71.3921	77.4028			119.859	94.7268	141.868	146.796	82.2794	141.475
86.0652	79.6164	95.102	63.4885	85.6933	86.0102	85.9226	108.232	92.6412	107.204	79.327	48.6381	70.7864			142.402	78.6875	120.129	161.601	93.9099	129.889
89.3072	73.7146	105.537	66.1858	97.3082	87.0883	59.0941	94.3892	86.0967	92.8509	76.54	60.256	65.5444			154.548	84.1909	97.5136	159.67	118.459	124.096
81.469	72.32	98.5308	69.4378	103.027	85.6219	64.7644	109.671	106.894	79.957	73.9653	56.3732	70.3856			150.446	98.2765	107.972	156.773	124.589	126.286
73.6598	97.7234	69.6018	66.4209	76.5247	83.5874	72.9391	83.722	91.187	75.9524	66.9792	61.7607	66.471			130.618	104.8	104.916	146.166	88.4613	117.031
99.2604	88.0581	81.3788	67.5445	97.0023	88.8013	68.5161	98.6827	112.42	75.3373	66.8996	58.2994	75.3518			156.814	95.224	109.947	120.032	86.4744	125.636
71.8982	85.6223	85.9587	64.6838	82.9633	71.3703	96.5539	105.377	57.1553	58.9636	61.9837	40.572	81.458			158.444	103.422	97.8377	128.207	79.5214	145.459
69.0016	79.371	96.6507	58.0528	93.7005	94.7547	82.7802	106.528	107.621	66.5911	68.9646	70.9105	75.2373			151.475	99.0703	126.003	168.939	90.1956	118.741
97.2142	64.3394	92.6174	62.8433	87.2989	74.6913	68.1114	120.725	109.511	68.637	78.1007	89.9624	69.4017			152.694	83.1531	114.146	154.07	88.724	120.323
72.1512	67.7347	97.3216	57.1427	67.8477	78.7816	63.06	113.566	92.4958	78.6437	65.1795	60.617	66.7105			165.219	89.5286	107.003	150.272	85.9401	123.064
65.5143	71.5651	93.4125	69.1161	78.4644	82.7742	44.6395	96.9122	92.6413	80.2494	59.908	53.3032	65.9973			144.786	99.4278	128.497	175.35	68.5065	129.931
82.0534	63.5548	92.1951	78.7294	82.8995	75.003	39.1548	101.405	131.036	57.091	65.2804	38.7961	71.8484			135.495	79.4638	130.806	159.953	95.959	138.197
87.5614	61.766	70.1649	68.908	76.0212	89.7095	49.5815	111.784	84.7879	67.2002	79.3695	38.8263	70.5938			134.568	102.14	130.578	144.209	85.8139	122.768
65.6411	69.0847	89.6773	77.0875	57.2903	90.4703	40.7593	107.757	99.913	46.7195	61.4741	34.7329	60.1096			140.601	98.4946	149.475	176.817	78.1502	119.363
81.4408	66.6526	94.1	68.2438	63.0769	96.8246	43.6635	118.999	124.636	70.7704	73.0629	44.003	51.9732			148.277	96.4537	129.36	146.114	84.7297	117.78
70.5302	72.3907	90.1163	66.8952	69.624	83.0448	39.6214	103.983	114.165	72.7486	67.1119	33.4989	64.1857			147.418	99.0092	125.785	134.605	94.7399	121.129
58.4267	71.2119	59.0506	66.1946	71.4851	79.5184	37.8455	89.8303	134.235	79.788	46.0259	47.3739	60.75			145.883	81.871	150.014	142.728	88.75	126.3
71.7321	60.8251	81.0143	57.3076	75.329	68.5763	43.0922	100.077	78.9706	68.435	63.4648	48.3672	55.4558			162.665	74.1959	165.514	145.483	84.7176	119.998
79.7695	69.0066	95.0109	71.712	76.0509	74.2861	27.2427	90.0627	103.403	71.3374	84.487	45.3876	65.1799			171.913	79.7952	149.028	148.238	103.344	115.505
71.7714	59.4343	98.2823	74.0424	73.3402	79.4759	28.033	100.719	114.02	73.5266	63.1941	40.4214	50.4948			151.473	85.4905	141.234	126.971	93.4222	144.611
67.6198	82.0225	79.0433	73.0255	77.7471	61.3549	30.104	89.6864	115.765	40.4684	57.4502	31.061	54.5344			147.452	85.0195	141.797	129.031	97.4321	145.657
66.6177	70.0441	115.857	64.6013	74.9413	64.5965	28.6377	108.42	156.486	55.9919	54.4986	33.8301	50.0159			136.04	93.1483	165.525	126.958	109.855	128.97
80.1478	61.8106	91.9217	64.0879	87.2321	75.0752	29.2613	105.433	152.56	47.7522	53.3412	33.6494	55.3516			149.44	81.8798	157.338	145.123	102.26	132.531
82.8308	74.3022	89.843	80.7564	71.1093	76.8463	32.0085	115.403	141.507	32.6751	54.679	33.86	47.8087			150.022	90.9939	154.64	142.78	115.269	134.975
72.5578	77.5338	68.6411	82.0037	86.736	66.76	34.5842	102.047	119.837	7.98327	47.0983	30.0076	47.1372			140.482	93.0436	166.555	135.519	131.666	122.796
69.6419	74.8934	85.9835	64.3121	61.9852	83.7943	31.9608	98.3065	132.926	2.49838	59.6002	26.3356	45.3621			130.745	95.7473	162.57	141.068	116.958	114.926
72.9782	76.4925	103.02	82.2712	68.6111	69.1261	30.9754	106.108	120.419	5.50167	61.6758	27.3891	48.475			128.86	104.504	179.425	138.364	134.788	136.148
75.6771	69.6834	88.2031	76.1619	63.0844	83.5208	34.9699	95.8278	152.705	1.60272	56.5053	22.7539	41.2704			127.446	91.7091	166.579	121.5	129.294	127.586
															99.417	87.2	180.629	152.718	131.703	148.03

## Sheet: Figure 3F
				GluA1 KO -20ms +DA
	108.499	101.389	100.8	69.4789	80.5053	102.377	103.817	106.132
	101.183	101.342	135.502	80.732	93.5277	105.474	96.3059	101.09
	100.371	111.426	126.439	123.316	108.009	104.812	106.654	89.6463
	116.515	91.859	100.218	62.7624	84.3355	113.468	107.099	83.7907
	88.7589	92.8264	97.9213	145.154	112.18	87.1626	106.932	110.38
	93.8997	122.241	85.8094	129.265	112.63	105.08	108.49	115.031
	99.1196	101.056	80.7251	83.6752	92.7252	103.016	85.2901	108.616
	114.644	85.3418	78.7397	79.692	113.931	99.1906	97.1403	93.6204
	90.0441	97.6311	89.6859	119.886	94.2937	93.5949	98.8649	95.8433
	75.1287	94.8878	140.513	106.038	107.863	85.8241	89.4069	95.8496
	89.3699	87.0355	25.2346	95.9825	69.2156	104.522	86.6965	65.4551
	92.7498	86.9276	47.3449	104.693	82.3778	122.421	80.227	76.5319
	95.7261	109.777	63.2286	116.929	91.2296	121.142	87.1258	94.4214
	91.2052	96.1247	59.4219	146.481	76.9548	86.1104	59.4747	104.723
	110.258	101.326	50.7452	108.605	102.781	85.0693	88.9617	83.4741
	124.508	84.9455	67.6537	75.0505	95.9108	73.0823	73.2168	94.3655
	113.449	101.167	50.6311	70.8766	89.2842	80.0574	72.3269	101.537
	93.6742	101.246	69.6974	102.771	116.703	71.253	65.4278	110.485
	87.5752	87.6411	55.5965	65.9632	100.045	74.1792	83.6208	121.464
	93.1557	105.226	50.864	79.6491	92.2875	68.1819	94.3028	88.1437
	108.443	77.3183	53.6087	79.6348	98.9993	93.7622	83.7321	142.439
	93.8547	92.8423	65.355	49.7681	105.529	69.2713	81.2283	148.109
	94.8468	93.7779	69.737	76.3767	107.292	69.8067	64.9827	130.654
	89.2887	73.0211	66.8467	81.3044	82.3291	72.0115	76.1097	116.931
	93.8209	71.6256	58.1712	72.9899	78.7423	99.1756	64.3707	91.2174
	97.0451	105.448	74.4718	95.8441	85.065	101.329	77.9459	82.9028
	85.4444	70.2303	93.3646	40.2801	85.7702	102.964	76.8333	81.1021
	90.6754	87.2447	65.5704	75.2795	83.995	99.1757	90.1302	67.5219
	68.6802	75.7961	73.9816	89.6428	93.2115	105.541	80.0601	81.4312
	71.059	76.7633	84.3642	59.2611	89.0775	83.1285	84.1216	97.8056
	78.2179	54.4209	59.9727	65.5387	85.4662	82.8794	72.3267	116.105
	77.6316	86.3408	63.741	53.1216	92.4942	89.8025	77.0557	119.017
	97.5299	81.108	55.1656	71.4681	100.933	81.9387	73.9959	82.1701
	110.247	98.6933	79.2311	68.5296	87.5819	96.547	82.2855	100.451
	99.7509	90.6223	60.0612	71.3869	110.088	94.6508	84.7335	81.636
	116.335	75.1142	71.2915	83.0264	100.835	106.727	92.0775	109.324
	133.099	97.8371	90.7969	82.6544	100.665	85.5862	73.4396	102.897
	131.96	92.7314	94.9658	68.1003	107.754	105.381	90.909	106.679
	127.011	71.3877	78.0573	81.8339	101.978	88.8284	79.5593	93.577
	114.677	79.776	67.1041	52.1437	92.1781	111.077	82.2299	78.3576
	109.108	73.465	83.9322	98.63	94.8652	89.9474	99.922	67.3543
	110.247	90.9393	89.2691	68.6632	102.416	91.0369	102.704	36.6608
	103.933	88.4181	100.841	53.2362	91.6187	78.9122	74.3852	38.5423
	97.5411	86.991	100.846	95.8394	100.239	91.7694	93.0788	43.8389
	102.964	86.9593	67.5687	74.917	84.9557	102.009	101.702	47.3224
	124.903	74.4798	64.796	72.3935	102.939	111.884	90.9093	54.3517
	85.4218	95.6172	81.1164	65.8106	105.748	119.577	102.537	53.5382
	102.862	92.3824	77.0139	56.3034	89.0045	114.189	89.0174	53.8424
	110.247	97.6469	92.2688	76.7726	95.8744	99.3616	96.0275	52.6502
	108.387	88.0534	110.337	74.7787	85.6365	101.563	68.4879	74.756
	115.827	86.1665	84.0126	60.549	91.1324	120.655	99.0321	50.2036
	110.878		104.767	68.4008	94.0749	105.693	90.8535	59.9651

## Sheet: Figure 3 G
GluA1 KO
	+10 ms	-20 ms	-20 ms + DA
	110.68	72.0039	115.893
	97.9871	81.92	91.7864
	166.214	84.438	98.5172
	124.932	78.915	64.9566
	129.47	71.6134	87.3826
	120.613	64.9103	111.26
		32.2549	92.5292
		101.57	57.2495
		128.986
		11.3367
		53.7596
		28.4426
		45.8724
