# Supplementary material for: Dopamine increases protein synthesis in hippocampal neurons enabling dopamine-dependent LTP
Source: eLife. 2025 Mar 10;13:RP100822. doi: 10.7554/eLife.100822 (PMC11893101; doi:10.7554/eLife.100822)
Supplement: Figure 4—figure supplement 1—source data 1. [file elife-100822-fig4-figsupp1-data1.xlsx]

## Sheet: Figure S4 ABC
				+10ms_+IEM								-20ms+DA+IEM throughout								-20ms+DA+IEM after pairing
	80.069	86.7636	107.354		78.0313	76.4996			73.139	93.0178	78.9079	92.8978	102.346	93.8966	83.7338		75.9121	94.6326	96.4553	70.3254	105.902	103.184	74.4435	90.3666	100.814
	86.9782	83.2636	99.4904	80.3652	90.5963	100.726	82.6462		89.2281	102.862	97.0914	97.2071	89.7711	98.3109	115.949		76.7861	104.318	88.7308	83.0159	91.0574	109.643	79.4326	91.1307	93.2643
	93.0333	92.0051	66.2299	73.4519	101.086	66.1934	114.489		113.859	80.6367	99.4487	114.543	84.643	111.345	110.862		100.203	89.9795	90.0349	102.766	105.321	116.941	98.0244	81.9864	85.6942
	97.3378	113.723	96.0396	85.6447	94.6749	104.653	83.6896		115.197	101.614	96.8585	121.306	94.1217	92.2952	105.071		99.1192	103.073	85.8435	85.0861	87.9101	103.1	106.957	107.192	97.7834
	87.0797	81.26	118.502	84.8068	120.319	111.52	86.3431		106.209	113.912	102.486	103.574	115.894	104.856	84.7303		106.354	117.655	83.9562	110.881	101.785	96.3466	113.786	106.152	85.6942
	111.266	119.557	103.084	132.113	115.601	86.598	97.7285		90.8062	105.302	107.229	86.9074	109.759	113.517	105.102		69.5861	125.514	94.5679	91.3175	117.938	100.331	89.4082	100.29	105.333
	100.788	112.337	98.6529	97.6286	112.005	97.4558	104.941		105.901	96.5532	110.361	91.7931	119.607	99.4249	93.8044		98.1057	94.9031	100.009	123.654	108.928	83.26	85.3853	120.132	88.8398
	107.545	112.717	104.105	125.618	90.4165	114.672	94.5647		118.937	98.3002	102.452	97.9322	96.698	90.8192	80.3978		124.703	81.0653	101.555	113.148	95.2665	99.9119	123.651	112.234	128.473
	111.909	107.028	115.705	144.348	102.389	124.993	102.492		126.072	99.3401	106.635	93.8441	90.7871	92.4902	94.2555		111.562	98.2848	126.903	120.176	89.4755	103.477	94.7221	94.2023	109.82
	123.994	91.3457	90.8367	137.141	94.8814	116.689	122.178		98.9169	108.463	98.5314	99.9955	96.3723	103.045	126.094		137.67	90.5746	131.944	99.6294	96.416	83.8052	134.189	96.3137	104.284
	118.886	75.2238		188.134	72.1351	168.639	167.368		80.6861	70.0162	82.6843	99.066	83.5736	59.7887	102.045		106.948	72.4876	153.513	113.614	82.0259	132.964	67.6673	66.5866	117.642
	142.861	99.749	139.456	177.952	98.3274	163.223	155.949		103.19	104.553	88.7267	77.9414	102.619	77.2423	117.072		70.0056	70.474	166.192	95.4476	75.9669	91.8585	70.1223	66.5232	122.014
	133.77	85.9689	124.887	150.968	78.014	150.749	170.362		95.2659	108.99	91.4881	98.1704	92.6343	78.0222	90.4055		81.3995	93.0365	174.804	119.348	93.8324	97.0177	50.5064	49.6826	115.252
	116.915	97.5508	136.511	171.499	95.9724	203.162	165.361		79.554	93.5863	86.1271	92.2216	94.8702	75.0143	90.521		65.462	73.8827	156.709	116.305	99.6125	85.8185	60.5215	45.7463	103.791
	124.188	95.3529	137.716	215.914	102.349	186.784	187.156		84.2538	86.0854	111.663	74.0038	82.2806	88.9672	98.053		57.7379	83.8248	165.225	114.566	114.982	95.1302	69.04	44.2232	116.342
	104.957	106.225	131.308	153.063	83.017	173.289	160.791		78.6278	69.5173	96.6019	75.6094	83.7048	68.2467	68.5228		83.2868	86.8142	132.528	144.677	82.0534	79.8624	69.4307	32.4246	104.725
	109.211	125.086	124.875	155.703	77.0363	200.461	154.803		75.7118	80.8863	85.1432	79.6146	67.9749	75.1396	77.4919		68.9221	74.5995	126.124	159.366	97.0783	100.331	75.3305	49.2351	99.5868
	116.112	117.655	116.857	160.018	94.5045	184.702	149.496		89.4683	75.2294	94.2968	84.3125	84.2249	86.0847	71.3027		67.4542	88.9514	127.061	145.889	104.019	99.4505	86.5758	30.0266	79.7177
	131.258	98.075	120.468	157.965	94.5177	187.203	183.958		81.475	91.7007	67.2163	70.7929	85.9602	71.2128	89.0838		64.099	84.5687	113.933	136.749	85.3649	108.888	84.9761	36.2602	82.6116
	138.15	127.25	103.197	181.178	80.8885	188.36	174.07		72.1784	63.4307	95.2663	93.4385	97.4271	80.3754	73.8938		63.6794	77.7378	131.769	149.853	97.2315	112.747	72.9204	29.2123	93.0757
	114.81	117.578	122.268	161.359	65.5089	196.631	173.061		74.4425	59.8258	83.2755	92.3908	71.4601	85.7087	77.7438		78.3586	79.9156	117.879	150.381	73.0769	101.086	80.1692	20.0178	106.455
	130.235	114.679	118.158	143.174	77.4732	222.173	201.411		62.4357	46.2109	78.5846	107.33	90.1017	78.2866	97.8432		52.7751	58.5976	108.909	127.184	67.8826	70.0053	91.074	32.0224	75.4609
	115.757	151.91	110.437	180.089	85.6159	222.488	205.471		64.5283	37.6424	89.7819	106.367	76.9871	68.8176	69.8025		44.9461	59.0034	127.503	124.275	81.7524	59.5613	81.2356	35.3655	77.4949
	142.751	147.387	130.88	133.202	109.258	237.426	202.171		67.9587	46.8486	99.0115	123.52	83.8166	86.5303	63.9175		49.3149	57.3125	86.6143	138.902	72.0588	69.9635	79.3139	34.7522	72.3362
	147.816	140.379	131.165	160.479	91.8644	230.595	207.886		81.0602	49.0113	91.8444	94.9932	71.7469	85.6948	62.2181		40.4376	64.3735	96.197	144.201	85.7864	48.3202	68.5992	18.8716	83.0204
	174.066	121.653	119.5	172.463	99.2504	196.793	188.903		80.4117	57.0529	98.5885	102.463	92.1725	88.4102	50.8885		62.9456	60.302	86.0394	143.29	84.7847	65.6851	79.694	29.71	73.5631
	156.18	104.297	115.8	209.294	106.823	202.889	182.938		83.1217	55.9853	101.511	123.435	104.791	72.0483	75.4988		53.4741	44.1916	98.6593	141.313	79.7765	49.0751	68.7971	33.9629	75.7543
	130.573	107.975	137.425	184.237	125.72	177.427	181.725		87.5815	87.2362	105.889	92.0881	108.627	69.6531	59.6375		39.3192	52.6864	97.701	128.209	62.5677	48.9913	61.0363	23.6724	77.1488
	161.449	110.156	120.07	170.996	117.094	186.067	154.769		68.5419	66.7583	91.2124	80.5915	114.644	76.2954	63.886		55.8856	48.155	91.9015	129.047	63.2191	67.1532	61.1366	24.8137	73.3323
	139.876	156.188	105.852	158.342	103.484	204.018	188.517		65.4203	77.8499	94.8434	95.213	106.673	89.4546	70.474		46.0646	56.5415	94.7554	149.118	80.6741	62.2038	57.3565	26.0956	88.6615
	136.704	128.653	111.369	160.689	126.316	219.902	179.445		65.18	70.9731	94.0687	91.0219	117.503	76.741	63.2357		75.3181	56.3927	98.526	148.528	66.8918	63.3363	55.469	20.7417	93.0232
	138.15	114.704	116.15	153.985	101.604	246.26	176.814		82.4357	68.0337	86.3553	98.407	109.745	84.7619	74.4812		65.2174	59.5444	84.6061	148.259	64.0455	64.3848	64.9933	30.1121	63.4659
	154.108	119.523	119.144	189.097	114.507	248.925	206.038		77.5986	73.3023	85.7374	106.705	114.382	73.0369	63.5712		66.895	62.6962	70.1739	139.285	53.0493	59.6451	73.0234	31.947	60.9076
	144.958	137.8	123.432	181.974	100.901	228.159	200.923		80.9949	61.5728	89.1307	101.417	124.745	91.4459	81.0901		62.4214	48.7231	83.4187	147.276	70.2033	75.8357	51.5569	25.9699	86.0507
	149.195	110.257	134.052	177.952	109.424	236.412	188.812		80.8577	59.0771	81.7357	109.003	122.548	86.7113	75.6247		61.2331	39.5114	79.0024	163.713	71.1338	56.7928	62.599	24.3612	87.959
	126.04	146.948	124.157	210.844	99.5302	238.487	175.918		73.3104	69.5174	84.0882	94.0638	137.111	86.0847	66.8443		68.0134	26.7152	82.7021	193.669	73.3616	71.0121	65.4367	25.9799	61.4003
	141.677	116.462	114.861	197.855	85.9595	239.321	175.215		77.6672	53.4759	96.6875	96.2101	108.68	82.3807	56.3015		53.7187	34.5607	82.3022	152.917	67.2695	67.6984	63.6021	28.0762	75.4189
	166.514	112.582	106.16	146.149	100.937	260.356	181.804		72.3843	44.3114	85.6899	97.3423	120.215	81.587	75.0267		60.8486	48.7366	79.3024	142.1	68.1124	68.2438	55.2473	26.7239	82.9891
	108.966	106.563	119.851	170.033	103.564	227.998	204.166		85.0085	50.7307	98.0086	96.7338	114.781	96.3335	78.6039		58.3322	35.2775	79.3774	153.849	85.9123	73.1933	53.7743	24.6326	73.5421
	126.252	113.132	134.747	193.246	108.9	254.936	225.35		87.9246	33.9822	85.3666	73.0236	114.679	92.0029	83.3035		50.6081	49.1559	88.5725	138.001	81.5827	72.1446	69.9005	30.6048	80.1266
	130.514	120.968	118.193	168.189	85.8223	280.285	230.407		72.6587	41.2196	98.7025	97.1563	142.264	89.4824	92.8183		62.2466	29.6234	88.9058	146.002	79.3605	55.4926	63.0029	29.9413	68.9497
	121.888	124.967	122.072	217.338	104.339	240.038	216.573		87.8216	51.0356	71.7836	97.8662	121.843	80.9603	95.4094		51.9362	40.553	82.5564	141.676	75.3976	69.9636	67.9366	32.681	72.8081
	122.404	121.569	116.174	161.611	113.094	228.936	208.385		83.5678	59.2436	93.9166	90.1768	118.032	81.6008	89.6817		65.5319	34.8312	106.925	139.854	69.322	60.9874	49.6247	25.6883	49.7095
	116.932	142.805	131.812	166.848	113.27	251.583	218.602		92.1441	64.3734	93.6173	89.315	109.623	95.2335	78.2473		67.3493	34.8853	108.588	158.175	71.7797	54.3602	70.3467	33.8775	81.1123
	115.156	123.606	117.546	196.095	117.33	256.258	196.5		93.5162	39.5837	92.0394	96.9029	124.157	94.8992	72.9497		51.6916	52.2265	89.9682	147.659	73.5093	55.0312	86.6972	25.4118	52.9076
	104.949	135.002	127.934	174.809	111.139	222.793	215.892		94.3738	45.2819	110.09	81.2877	120.998	84.2884	86.0835		59.7651	38.1182	112.854	160.887	65.8245	59.3934	67.6805	34.5612	49.5943
	98.0228	113.884	122.992	145.688	133.326	268.567	204.824		90.0857	47.3892	70.5432	97.3761	129.776	66.2972	69.8655		64.1339	46.1259	105.146	152.668	65.5344	54.1085	60.3525	26.6134	56.4095
	86.4284	136.803	111.702	156.499	124.07	267.424	205.902		86.1406	47.6529	85.9655	101.703	114.722	65.7681	66.2044		63.8893	33.7626	99.0093	153.786	74.5547	71.012	50.7993	23.6373	49.7725
	100.518	103.612	115.788	167.309	87.1637	251.243	221.279		90.8061	50.0235	86.954	84.0423	113.249	81.0159	76.6737		71.7879	33.4109	104.376	175.255	65.3264	74.074	67.8706	29.5139	32.6609
	107.672	118.026	132.311	177.449	116.651	235.549	244.855		84.0137	46.2524	92.6334	86.9152	109.813	74.5408	66.1625		64.099	33.7625	104.726	168.34	75.0966	67.1111	76.6398	24.8136	46.9415
	105.22	105.354	125.618	205.69	99.8273	241.804	206.378		103.053	41.1641	84.0929	88.3518	111.504	53.4444	87.4578		61.3729	38.3482	99.0134	147.565	75.2116	70.8863	79.6122	33.8271	47.0674
	84.6695	133.159	102.632	171.876	113.692	240.36	221.335											35.0071	82.5396	169.065	77.056	50.1656	72.7435	24.7131	40.4408

## Sheet: Figure S4 D
	+10 ms +IEM	-20 ms +DA +IEM	-20 ms +DA +IEM after pairing
	87.2187	84.0148	60.0739
	109.945	45.7677	35.546
	114.732	80.0381	88.2252
	137.991	97.4386	148.54
	105.044	112.865	72.2933
	228.77	68.3056	70.7838
	210.632	73.3213	65.9052
			26.0994
			40.4287
