# Supplementary material for: Dopamine increases protein synthesis in hippocampal neurons enabling dopamine-dependent LTP
Source: eLife. 2025 Mar 10;13:RP100822. doi: 10.7554/eLife.100822 (PMC11893101; doi:10.7554/eLife.100822)
Supplement: Figure 4—source data 1. [file elife-100822-fig4-data1.xlsx]

## Sheet: Figure 4 ABC
			NASPM +10ms								NASPM -20ms+DA					NASPM
	105.768	67.8082	102.014	79.2234	93.1965	104.114		102.185	105.537	98.0042	84.1455	102.535	84.1668
	125.978	71.1332	100.614	95.2162	82.6428	109.554		109.41	98.5704	101.927	105.242	104.671	96.8559			+10 ms - DA	-20 ms + DA
	86.6522	79.3713	84.5044	111.874	78.8974	115.27		100.651	85.301	88.96	100.062	101.275	102.565
	109.422	81.7242	96.137	97.3876	104.538	105.455		106.663	90.6554	83.4021	102.14	81.5207	140.345			140.607	51.8027
	83.2433	96.8079	93.1294	86.8696	107.154	81.1627		87.3758	104.341	100.965	91.7681	81.9561	130.99			116.667	70.1358
	89.6753	119.513	93.1639	116.313	111.631	105.555		106.682	103.907	129.007	105.495	107.086	114.89			186.628	31.6809
	116.368	150.801	111.244	94.1694	96.4464	96.8813		98.1767	102.844	116.049	90.2171	103.429	80.2272			119.116	55.7599
	105.189	129.512	108.495	117.129	106.545	91.2658		101.159	109.818	99.3945	116.066	97.9084	88.0242			151.359	110.133
	87.0897	110.546	109.861	100.185	113.727	75.66		96.7372	109.319	92.7632	104.835	111.626	78.7689			123.233	128.597
	90.6144	92.7836	100.838	60.8069	105.221	115.082		90.9604	89.7074	89.5285	100.029	107.992	63.8572
	100.88	158.547	163.236	89.5143	136.687	100.328		98.9857	82.6113	62.9317	73.1996	101.559	54.896
	125.54	133.708	122.548	100.774	135.737	110.105		76.8384	77.386	62.4475	88.2813	100.213	126.568
	149.545	141.59	113.715	100.313	166.772	113.916		93.6512	75.5115	72.085	82.3306	103.922	76.0113
	151.088	133.417	129.686	81.3669	158.583	101.381		91.8731	68.1962	52.0791	53.0171	116.665	49.9744
	157.623	139.783	135.39	88.789	161.646	110.269		94.197	67.7618	64.1327	43.3267	110.523	57.6655
	122.968	176.286	120.353	99.9481	139.019	107.122		105.863	65.151	70.7136	51.5872	105.409	49.8451
	131.548	145.301	137.032	107.113	141.042	111.484		99.2492	52.5101	74.4032	46.1425	113.118	48.5161
	113.216	143.985	152.398	101.645	157.088	95.8158		96.2856	61.0642	45.7129	51.8622	124.414	51.1034
	140.244	152.425	141.976	98.0453	161.719	99.3256		97.9226	59.7966	44.5092	64.7206	126.133	45.2763
	149.622	160.58	146.902	112.893	173.142	102.271		94.7426	65.7974	76.6672	65.7545	124.2	54.8431
	126.222	140.642	150.462	100.415	131.227	109.541		81.4015	72.8648	66.2235	57.9779	117.982	68.2789
	119.43	146.605	151.361	90.2435	169.754	104.753		69.2364	64.6123	60.7574	45.6365	107.864	66.1092
	114.49	133.696	134.595	106.162	179.252	117.451		108.15	65.2479	67.2809	53.6881	127.886	58.0359
	107.145	151.417	124.847	116.526	215.251	99.0122		92.8703	77.1024	48.7929	39.6308	147.594	74.0708
	109.1	144.589	127.491	124.245	215.617	109.491		89.5492	65.2335	43.0504	49.0574	120.542	68.6906
	134.314	157.883	123.412	102.49	152.912	103.976		97.1512	60.6656	55.9776	54.3041	120.74	77.834
	132.86	143.588	130.17	78.6638	169.47	95.9662		73.8278	61.452	49.2815	37.7719	115.939	82.932
	127.483	146.539	164.48	114.768	178.894	104.716		78.7672	64.2352	47.994	54.249	127.276	98.4024
	129.284	115.827	153.263	100.763	190.033	114.355		80.6958	51.2531	38.5072	61.2557	114.07	118.824
	120.974	149.135	159.45	90.1767	232.532	110.206		81.6085	48.348	44.2248	40.7088	128.768	117.871
	109.242	144.406	151.448	80.85	181.202	98.5359		72.2659	60.1951	36.9541	42.2048	115.736	145.202
	124.859	154.392	149.339	108.802	233.458	121.976		55.3308	57.1391	41.1157	46.0765	118.708	144.919
	116.201	142.889	145.312	99.3219	174.872	103.55		58.1439	72.5129	26.3655	44.7786	101.403	135.893
	118.439	144.607	148.855	106.033	212.473	99.4385		57.4665	84.4068	42.984	36.0561	118.011	120.858
	174.578	142.521	144.793	128.162	194.103	115.872		73.8842	85.8828	35.775	43.0297	130.376	114.202
	124.627	160.372	182.076	133.096	162.548	101.908		62.0202	75.9173	30.8447	29.3574	108.816	126.003
	147.756	135.45	153.625	129.399	202.285	118.04		73.9783	67.1872	30.2519	47.8364	131.032	112.773
	174.578	131.473	172.483	106.097	133.421	100.855		72.8586	72.8756	26.553	47.7924	122.4	132.336
	159.707	139.741	163.063	95.9925	207.777	99.6264		80.6864	60.5865	29.0045	42.0067	129.778	114.69
	135.574	155.465	172.552	113.873	196.232	132.706		78.9271	70.7101	28.4192	39.3009	123.027	123.951
	133.336	169.666	184.53	118.846	189.887	113.352		61.6909	81.2825	24.2233	44.2286	122.313	110.292
	115.403	128.196	168.87	124.758	148.452	116.423		59.6869	69.2126	11.9428	52.4782	112.177	118.277
	120.832	140.986	164.964	127.906	194.363	128.695		59.7244	72.8073	27.809	48.3534	97.6994	118.547
	104.559	142.017	147.697	119.33	187.311	112.199		66.809	67.2805	23.3398	54.4801	105.049	119.476
	114.516	145.093	169.233	115.837	197.41	101.945		75.4835	72.7606	24.0889	55.0411	96.7417	114.725
	151.037	146.332	175.145	112.328	198.848	121.086		80.2724	83.0709	25.8438	60.5737	96.1263	119.723
	139.601	135.006	192.118	129.926	188.635	136.429		86.6796	73.9709	31.3958	53.6772	123.828	101.542
	128.834	141.934	179.086	129.123	171.501	127.955		73.4137	68.8858	26.914	55.701	115.26	125.339
	122.813	130.14	187.106	108.571	179.203	122.64		67.8722	66.5227	36.0693	55.052	105.263	113.773
	143.293	147.809	204.546	93.3894	147.135	108.99		19.4565	76.9515	42.8913	55.426	120.809	105.776
	130.776	138.058	203.682	129.853	150.897	118.504		8.33585	75.2098	29.5218	68.1304	116.253	101.237
	161.547	145.496	202.351	120.992	158.632	119.005

## Sheet: Figure 4 DEF
BURST reactivation					-20ms+DA+NASPM		(NASPM before burst)								-20ms+DA_NASPM_after_Burst
			95.9151	91.3479	106.917	57.623	84.0832	82.8596	89.8287				84.0315	70.7075	79.7421	102.014	68.4888	87.317
			98.7366	75.8284	102.365	67.2713	67.6156	80.1242	78.503				83.7675	86.3371	92.1264	99.7228	85.9052	92.8613
			90.1732	93.9742	119.005	70.626	91.2328	89.5902	101.513				91.5139	98.5446	90.4942	92.7083	97.573	88.331
			114.206	96.1879	102.29	101.946	81.6513	92.1681	97.7758				86.6702	102.493	91.3713	99.4004	114.108	105.798
			101.105	101.784	98.7636	102.681	94.5818	106.575	123.124				89.158	96.9777	102.499	86.4154	117.829	106.861
			100.279	94.8083	99.5973	105.182	130.814	106.188	96.1909				120.925	95.5902	104.1	96.1432	110.136	116.657
			96.4668	112.62	79.3061	137.704	118.914	110.885	75.1471				96.4708	108.293	116.75	124.153	109.109	113.304
			100.932	108.687	117.304	119.944	110.494	101.734	127.588				116.421	101.168	114.78	102.676	114.73	79.5486
			96.519	111.313	89.7684	122.178	102.018	109.553	104.556				115.714	122.059	100.831	102.558	91.4622	108.251
			105.667	113.449	84.6831	114.845	118.594	120.323	105.773				115.328	117.83	107.306	94.209	90.659	101.071
																						-20 NASPM during DA-LTP	-20 after DA-LTP	-20 after NASPM
																						65.2696	124.497	120.531
																						30.0832	105.661	64.2477
																						99.9363	105.504	95.1287
																						93.9167	126.759	123.773
																						111.36	120.549	63.4593
																						90.8295	122.47	79.4605
																						55.7802
													135.928		104.436	103.761	112.516	120.075
			77.4902	63.3522	103.065	122.89	86.8207	93.1276	50.1208				152.09	116.462	123.304	111.666	115.973	115.349
			55.9088	59.4701	103.015	130.468	93.707	90.2059	51.2243				121.868	117.417	105.552	123.157	131.541	134.614
			61.8675	71.7582	133.461	126.586	95.6025	75.8567	55.7427				138.652	105.942	115.026	151.687	130.805	111.195
			73.2881	58.1729	100.489	120.493	82.0653	79.8379	51.4831				137.276	120.512	119.362	140.718	122.622	147.878
			76.4993	60.0246	91.8777	117.888	74.196	101.104	43.2909				147.473	114.856	111.764	124.505	128.591	136.299
			64.5738	58.7459	102.474	167.25	110.292	90.922	58.2495				151.487	127.57	124.071	166.423	128.796	124.458
			76.6064	54.2724	118.572	130.089	95.0193	95.691	56.9553				128.389	103.432	135.97	143.507	119.398	100.744
			64.3734	49.7578	128.692	138.194	94.5536	89.9195	59.8252				130.095	100.77	126.315	138.717	109.214	123.183
			58.8978	50.592	94.6203	133.578	95.6683	109.625	59.2304				132.62	88.1457	127.417	161.372	104.295	112.519
			78.0995	70.397	106.275	140.309	105.711	95.6765	58.3812				124.94	89.962	135.037	148.281	107.695	122.479
			59.9599	56.0096	126.716	124.738	77.6062	82.2151	68.0402				145.945	88.399	123.558	127.879	87.1221	113.959
			81.2942	50.2298	129.651	132.902	116.341	93.3709	49.0537				155.152	106.172	125.434	143.986	79.8109	87.3334
			58.8841	52.9524	112.027	156.296	117.225	91.6667	64.4118				175.489	84.1856	121.785	131.028	84.0343	109.428
			65.5042	60.3271	125.783	122.735	100.974	79.0502	61.1922				146.624	91.1235	136.23	127.933	82.4299	96.6718
			65.8665	57.16	118.58	115.587	101.082	95.9057	43.0366				145.201	89.6268	122.136	130.752	78.5988	100.237
			84.3491	54.4604	122.015	140.28	89.9769	76.7875	39.8578				140.96	91.6497	131.686	128.005	69.8707	70.8316
			68.4575	45.0001	125.449	120.137	105.894	86.7835	48.5904				149.753	85.655	121.053	138.121	75.3046	82.7214
			66.6103	43.5151	112.152	114.014	100.551	81.8571	60.3384				132.941	91.33	112.613	137.025	82.1082	111.456
			87.1432	43.1897	129.526	135.248	73.8056	78.0192	56.492				139.189	85.4407	110.584	145.64	83.4986	94.464
			82.4361	54.905	93.8284	112.774	70.6636	77.6325	49.4441				155.925	79.6682	108.92	144.851	75.6789	81.2004
			55.2063	51.6966	79.4645	106.392	98.0014	92.0105	55.5884				143.787	79.6371	101.997	144.291	86.8869	94.235
			68.4684	48.9282	105.024	108.633	125.843	97.1945	50.7656				175.319	80.9623	109.515	135.88	81.2024	81.8055
			63.174	49.6523	121.072	106.503	145.344	85.5375	51.9055				142.242	73.9854	104.164	130.003	82.7357	92.7795
			78.1105	52.9524	119.055	97.5448	131.068	86.9552	37.896				125.487	73.7165	108.938	136.7	73.8764	97.9966
			70.6148	38.9408	95.0122	128.865	123.006	92.1251	41.5834				139.292	58.5312	99.232	128.8	75.8058	96.263
			66.7366	32.6524	94.237	135.366	122.272	105.944	52.4004				157.687	77.4504	113.401	141.929	72.5131	89.6394
			65.8034	30.0444	119.163	90.0488	134.723	91.7813	52.9681				128.362	75.981	102.998	137.23	67.0139	87.2189
			66.2261	34.5454	67.7849	118.304	124.742	97.8532	63.9759				126.57	68.8756	100.104	118.959	72.8125	84.0461
			61.1182	26.5564	94.3703	121.896	139.925	100.975	60.4791				132.931	64.3699	95.841	121.797	60.4434	82.6724
			66.3523		94.7871	97.916	125.33	101.634	54.3804				135.315	63.489	105.252	123.11	54.6814	68.8037
